# Supplementary material for: Cancer-associated fibroblast-derived gene signature discriminates distinct prognoses by integrated single-cell and bulk RNA-seq analyses in breast cancer.
Source: publisher site journal article supplement (doi:10.18632/aging.205817), 2024-05-09
Supplement: Supplementary file [file aging-v16i9-205817-supplementary-material-SD3.pdf]

## SUPPLEMENTARY TABLES

Supplementary Table 3. A list of significantly prognostic genes identified by univariate Cox regression analysis.

| Gene     | HR   | CI5  | CI95 | P-value     |
|----------|------|------|------|-------------|
| CXCL14   | 0.92 | 0.86 | 0.98 | 0.008001475 |
| WLS      | 0.88 | 0.79 | 0.99 | 0.028963359 |
| SDC1     | 1.21 | 1.05 | 1.39 | 0.009853082 |
| TNN      | 0.89 | 0.82 | 0.96 | 0.001691972 |
| PDLIM4   | 0.87 | 0.77 | 0.99 | 0.030797728 |
| ITPRIPL2 | 1.15 | 1    | 1.32 | 0.047845533 |
| EMP1     | 1.23 | 1.05 | 1.43 | 0.009450169 |
| CERCAM   | 1.24 | 1.03 | 1.49 | 0.020515589 |
| MARVELD1 | 1.24 | 1.04 | 1.48 | 0.017340631 |
| CYTH3    | 1.23 | 1.02 | 1.49 | 0.027050121 |
| PRKG1    | 1.16 | 1.01 | 1.33 | 0.030374849 |
| XG       | 1.15 | 1.02 | 1.3  | 0.026768892 |
