# Supplementary material for: Cancer-associated fibroblast-derived gene signature discriminates distinct prognoses by integrated single-cell and bulk RNA-seq analyses in breast cancer
Source: Aging (Albany NY). 2024 May 9;16(9):8279–305. doi: 10.18632/aging.205817 (PMC11132004; doi:10.18632/aging.205817)
Supplement: Supplementary Tables [file aging-16-205817-s002.xlsx]

## Sheet: Supplementary Table 1
Supplementary Table 1. List of marker genes for each cell subpopulation of breast cancer.
gene	p_val	avg_log2FC	pct.1	pct.2	p_val_adj	cluster
ACKR1	0	4.55004	0.614	0.018	0	Endothelial cells
FABP4	0	4.1278	0.589	0.048	0	Endothelial cells
PLVAP	0	4.07279	0.846	0.022	0	Endothelial cells
RAMP2	0	3.79667	0.898	0.042	0	Endothelial cells
VWF	0	3.41119	0.823	0.009	0	Endothelial cells
AQP1	0	3.36901	0.785	0.026	0	Endothelial cells
CLDN5	0	3.29994	0.678	0.009	0	Endothelial cells
SPARCL1	0	3.1529	0.939	0.159	0	Endothelial cells
GNG11	0	3.02801	0.874	0.079	0	Endothelial cells
EGFL7	0	3.00861	0.803	0.046	0	Endothelial cells
ENG	0	3.00004	0.853	0.103	0	Endothelial cells
PECAM1	0	2.98602	0.857	0.071	0	Endothelial cells
RAMP3	0	2.89295	0.724	0.013	0	Endothelial cells
HSPG2	0	2.87122	0.805	0.055	0	Endothelial cells
A2M	0	2.76436	0.871	0.14	0	Endothelial cells
CLEC14A	0	2.67967	0.758	0.008	0	Endothelial cells
EMCN	0	2.62687	0.785	0.006	0	Endothelial cells
RBP7	0	2.62628	0.596	0.028	0	Endothelial cells
SPRY1	0	2.62396	0.723	0.092	0	Endothelial cells
NPDC1	0	2.58089	0.854	0.205	0	Endothelial cells
CALCRL	0	2.52801	0.666	0.018	0	Endothelial cells
ADGRL4	0	2.51417	0.764	0.004	0	Endothelial cells
IGFBP7	0	2.51244	0.964	0.22	0	Endothelial cells
CAV1	0	2.49571	0.815	0.144	0	Endothelial cells
ID1	0	2.49485	0.693	0.099	0	Endothelial cells
IFI27	0	2.48382	0.958	0.271	0	Endothelial cells
ESAM	0	2.48239	0.779	0.039	0	Endothelial cells
IGFBP3	0	2.43472	0.3	0.043	0	Endothelial cells
TM4SF1	0	2.38184	0.872	0.208	0	Endothelial cells
CD34	0	2.31932	0.705	0.02	0	Endothelial cells
RNASE1	0	2.31093	0.865	0.07	0	Endothelial cells
SDPR	0	2.26697	0.571	0.016	0	Endothelial cells
IFITM3	0	2.24038	0.984	0.517	0	Endothelial cells
FKBP1A	0	2.22812	0.917	0.501	0	Endothelial cells
CRIP2	0	2.18701	0.914	0.265	0	Endothelial cells
IGFBP4	0	2.17216	0.882	0.26	0	Endothelial cells
PDLIM1	0	2.13608	0.777	0.223	0	Endothelial cells
SLC9A3R2	0	2.10344	0.434	0.075	0	Endothelial cells
HYAL2	0	2.09638	0.568	0.051	0	Endothelial cells
PLPP1	0	2.08675	0.551	0.12	0	Endothelial cells
COL4A1	0	2.05528	0.527	0.063	0	Endothelial cells
EMP1	0	2.05519	0.745	0.149	0	Endothelial cells
PRCP	0	2.05462	0.653	0.164	0	Endothelial cells
PALMD	0	2.05052	0.65	0.031	0	Endothelial cells
EPAS1	0	2.04162	0.741	0.106	0	Endothelial cells
COL15A1	0	2.00114	0.584	0.037	0	Endothelial cells
BCAM	0	1.97278	0.768	0.176	0	Endothelial cells
CD93	0	1.95904	0.672	0.046	0	Endothelial cells
PTRF	0	1.94158	0.792	0.142	0	Endothelial cells
CD36	0	1.94038	0.45	0.038	0	Endothelial cells
PDK4	0	1.94035	0.619	0.125	0	Endothelial cells
MCTP1	0	1.93999	0.57	0.033	0	Endothelial cells
COL4A2	0	1.93064	0.577	0.083	0	Endothelial cells
CXorf36	0	1.9218	0.628	0.002	0	Endothelial cells
SOCS3	0	1.91814	0.779	0.332	0	Endothelial cells
TCF4	0	1.91806	0.78	0.155	0	Endothelial cells
CYYR1	0	1.91132	0.638	0.013	0	Endothelial cells
ID3	0	1.89471	0.811	0.268	0	Endothelial cells
FLT1	0	1.89375	0.556	0.011	0	Endothelial cells
CD59	0	1.87982	0.873	0.394	0	Endothelial cells
LMCD1	0	1.86164	0.666	0.094	0	Endothelial cells
EDN1	0	1.84305	0.347	0.045	0	Endothelial cells
RCAN1	0	1.83391	0.455	0.081	0	Endothelial cells
ADAMTS9	0	1.82398	0.518	0.018	0	Endothelial cells
SELE	0	1.82194	0.282	0.002	0	Endothelial cells
IL33	0	1.80674	0.537	0.021	0	Endothelial cells
ADAMTS1	0	1.80297	0.559	0.065	0	Endothelial cells
TGFBR2	0	1.75983	0.726	0.149	0	Endothelial cells
STC1	0	1.75742	0.33	0.016	0	Endothelial cells
TSPAN7	0	1.75684	0.515	0.005	0	Endothelial cells
ETS2	0	1.74062	0.677	0.151	0	Endothelial cells
ADAM15	0	1.72873	0.668	0.162	0	Endothelial cells
ARHGAP29	0	1.72837	0.683	0.124	0	Endothelial cells
ZNF385D	0	1.71651	0.496	0.013	0	Endothelial cells
ICAM2	0	1.70867	0.604	0.093	0	Endothelial cells
PTPRB	0	1.70266	0.561	0.003	0	Endothelial cells
CDH5	0	1.68846	0.555	0.002	0	Endothelial cells
MGLL	0	1.66964	0.583	0.116	0	Endothelial cells
PODXL	0	1.66235	0.428	0.022	0	Endothelial cells
CLU	0	1.65645	0.562	0.193	0	Endothelial cells
SOX17	0	1.64985	0.423	0.002	0	Endothelial cells
SPTBN1	0	1.64861	0.698	0.15	0	Endothelial cells
MMRN2	0	1.64653	0.563	0.006	0	Endothelial cells
JAM2	0	1.64403	0.571	0.021	0	Endothelial cells
APP	0	1.63775	0.801	0.292	0	Endothelial cells
STOM	0	1.6307	0.75	0.255	0	Endothelial cells
MGST2	0	1.63048	0.678	0.145	0	Endothelial cells
GSN	0	1.62724	0.814	0.304	0	Endothelial cells
DUSP23	0	1.62207	0.653	0.268	0	Endothelial cells
S1PR1	0	1.60929	0.594	0.032	0	Endothelial cells
NNMT	0	1.60339	0.701	0.146	0	Endothelial cells
THBD	0	1.58551	0.533	0.055	0	Endothelial cells
ITGA6	0	1.56331	0.574	0.071	0	Endothelial cells
VIM	0	1.54892	0.978	0.711	0	Endothelial cells
VWA1	0	1.54455	0.437	0.045	0	Endothelial cells
ECSCR.1	0	1.5396	0.35	0.002	0	Endothelial cells
ADCY4	0	1.52161	0.512	0.009	0	Endothelial cells
SPARC	0	1.51934	0.846	0.18	0	Endothelial cells
FABP5	0	1.5138	0.625	0.238	0	Endothelial cells
MALL	0	1.51283	0.518	0.031	0	Endothelial cells
HEG1	0	1.51228	0.511	0.044	0	Endothelial cells
NRN1	0	1.50503	0.512	0.026	0	Endothelial cells
LDB2	0	1.48442	0.536	0.031	0	Endothelial cells
MTUS1	0	1.47574	0.545	0.082	0	Endothelial cells
NRP1	0	1.46194	0.555	0.072	0	Endothelial cells
SEPW1	0	1.46129	0.878	0.543	0	Endothelial cells
SNCG	0	1.45892	0.545	0.058	0	Endothelial cells
NOTCH4	0	1.4531	0.383	0.012	0	Endothelial cells
CCDC85B	0	1.44867	0.772	0.366	0	Endothelial cells
FAM167B	0	1.4373	0.415	0.009	0	Endothelial cells
TGM2	0	1.41644	0.435	0.03	0	Endothelial cells
KLF4	0	1.40954	0.665	0.232	0	Endothelial cells
KCTD12	0	1.40307	0.485	0.085	0	Endothelial cells
APOLD1	0	1.39265	0.458	0.032	0	Endothelial cells
INSR	0	1.38766	0.329	0.057	0	Endothelial cells
GIMAP7	0	1.38485	0.641	0.149	0	Endothelial cells
IL3RA	0	1.38212	0.476	0.012	0	Endothelial cells
NEDD9	0	1.38201	0.593	0.138	0	Endothelial cells
VAMP5	0	1.37886	0.751	0.248	0	Endothelial cells
SLCO2A1	0	1.37736	0.355	0.006	0	Endothelial cells
LIFR	0	1.37623	0.414	0.019	0	Endothelial cells
YBX3	0	1.37507	0.675	0.235	0	Endothelial cells
ADGRF5	0	1.36936	0.42	0.021	0	Endothelial cells
TIE1	0	1.35754	0.457	0.003	0	Endothelial cells
LIMS2	0	1.35343	0.499	0.033	0	Endothelial cells
ELK3	0	1.35059	0.545	0.069	0	Endothelial cells
RAB13	0	1.34931	0.724	0.282	0	Endothelial cells
PRKCDBP	0	1.349	0.575	0.113	0	Endothelial cells
C10orf10	0	1.34042	0.266	0.076	0	Endothelial cells
ENPP2	0	1.32824	0.347	0.034	0	Endothelial cells
IFITM2	0	1.32784	0.921	0.611	0	Endothelial cells
TFPI	0	1.31756	0.464	0.078	0	Endothelial cells
CD320	0	1.31552	0.535	0.129	0	Endothelial cells
CCL14	0	1.31496	0.38	0.002	0	Endothelial cells
APLNR	0	1.31447	0.35	0.005	0	Endothelial cells
TNFRSF10D	0	1.3142	0.441	0.031	0	Endothelial cells
IL6	0	1.31368	0.289	0.023	0	Endothelial cells
SRP14	0	1.3106	0.941	0.787	0	Endothelial cells
LPAR6	0	1.30509	0.516	0.091	0	Endothelial cells
TM4SF18	0	1.30465	0.398	0.022	0	Endothelial cells
IFITM1	0	1.30043	0.783	0.528	0	Endothelial cells
WWTR1	0	1.29766	0.512	0.086	0	Endothelial cells
SCARB1	0	1.2811	0.372	0.054	0	Endothelial cells
CFI	0	1.27901	0.456	0.02	0	Endothelial cells
MYCT1	0	1.26982	0.446	0.001	0	Endothelial cells
SH3BP5	0	1.26269	0.583	0.156	0	Endothelial cells
SWAP70	0	1.25979	0.554	0.117	0	Endothelial cells
PIK3R3	0	1.25764	0.467	0.087	0	Endothelial cells
ADM5	0	1.25674	0.316	0.004	0	Endothelial cells
ICAM1	0	1.25317	0.546	0.161	0	Endothelial cells
HLA-E	0	1.25207	0.94	0.743	0	Endothelial cells
BACE2	0	1.24812	0.502	0.102	0	Endothelial cells
BTNL9	0	1.23513	0.213	0.004	0	Endothelial cells
RDX	0	1.23307	0.546	0.163	0	Endothelial cells
SOX18	0	1.23189	0.297	0.002	0	Endothelial cells
NDRG1	0	1.22963	0.544	0.129	0	Endothelial cells
SOCS2	0	1.21847	0.479	0.049	0	Endothelial cells
ITM2B	0	1.21719	0.933	0.712	0	Endothelial cells
ERG	0	1.21292	0.452	0.004	0	Endothelial cells
CAV2	0	1.21243	0.543	0.083	0	Endothelial cells
EFNB2	0	1.19551	0.368	0.025	0	Endothelial cells
DLL4	0	1.18786	0.309	0.004	0	Endothelial cells
NFIB	0	1.18747	0.582	0.139	0	Endothelial cells
TMEM255B	0	1.17842	0.42	0.014	0	Endothelial cells
CDC37	0	1.17744	0.793	0.429	0	Endothelial cells
PVRL2	0	1.17465	0.621	0.201	0	Endothelial cells
ANGPT2	0	1.16867	0.305	0.035	0	Endothelial cells
BST2	0	1.16697	0.812	0.464	0	Endothelial cells
FSCN1	0	1.16679	0.464	0.1	0	Endothelial cells
THSD7A	0	1.15975	0.383	0.002	0	Endothelial cells
TSC22D1	0	1.15923	0.712	0.309	0	Endothelial cells
CNN3	0	1.15432	0.672	0.225	0	Endothelial cells
PCDH17	0	1.14808	0.295	0.002	0	Endothelial cells
RAB11A	0	1.14806	0.71	0.349	0	Endothelial cells
SERPINH1	0	1.13767	0.682	0.218	0	Endothelial cells
ADIRF	0	1.13166	0.612	0.214	0	Endothelial cells
TIMP3	0	1.12982	0.646	0.154	0	Endothelial cells
RCN1	0	1.12859	0.597	0.182	0	Endothelial cells
ITGA5	0	1.12783	0.449	0.053	0	Endothelial cells
KDR	0	1.12359	0.306	0.001	0	Endothelial cells
ROBO4	0	1.11094	0.386	0.001	0	Endothelial cells
FAM107A	0	1.11054	0.336	0.006	0	Endothelial cells
PRSS23	0	1.1055	0.589	0.138	0	Endothelial cells
FZD4	0	1.10089	0.406	0.03	0	Endothelial cells
CDKN1A	0	1.09953	0.7	0.419	0	Endothelial cells
FCGRT	0	1.09831	0.724	0.271	0	Endothelial cells
CYB5R3	0	1.09737	0.695	0.301	0	Endothelial cells
GJA1	0	1.09694	0.437	0.059	0	Endothelial cells
PREX2	0	1.09234	0.379	0.005	0	Endothelial cells
OLFM1	0	1.08733	0.351	0.027	0	Endothelial cells
TMEM88	0	1.08626	0.345	0.012	0	Endothelial cells
SMAD1	0	1.07985	0.396	0.057	0	Endothelial cells
NOSTRIN	0	1.07956	0.393	0.036	0	Endothelial cells
TMEM204	0	1.07682	0.419	0.062	0	Endothelial cells
ECE1	0	1.07585	0.511	0.113	0	Endothelial cells
CDC42EP3	0	1.073	0.578	0.18	0	Endothelial cells
PLXND1	0	1.07197	0.414	0.068	0	Endothelial cells
LEPROT	0	1.06804	0.641	0.255	0	Endothelial cells
HEY1	0	1.06575	0.204	0.019	0	Endothelial cells
SELP	0	1.06413	0.307	0.002	0	Endothelial cells
MEF2C	0	1.05997	0.545	0.124	0	Endothelial cells
TINAGL1	0	1.05637	0.519	0.082	0	Endothelial cells
PLSCR1	0	1.05584	0.636	0.235	0	Endothelial cells
CD151	0	1.05318	0.733	0.337	0	Endothelial cells
CD74	0	1.05264	0.943	0.67	0	Endothelial cells
GJA4	0	1.05132	0.195	0.043	0	Endothelial cells
SLC29A1	0	1.0468	0.463	0.099	0	Endothelial cells
FLOT1	0	1.04512	0.672	0.313	0	Endothelial cells
IGF2	0	1.04126	0.273	0.044	0	Endothelial cells
CXCL12	0	1.03921	0.296	0.091	0	Endothelial cells
TACC1	0	1.03742	0.561	0.183	0	Endothelial cells
NUAK1	0	1.03713	0.369	0.017	0	Endothelial cells
BMPR2	0	1.0353	0.433	0.078	0	Endothelial cells
PTPRM	0	1.03428	0.365	0.022	0	Endothelial cells
PKP4	0	1.03254	0.42	0.065	0	Endothelial cells
S100A16	0	1.02405	0.683	0.189	0	Endothelial cells
TCN2	0	1.02006	0.42	0.06	0	Endothelial cells
ABL2	0	1.0157	0.381	0.087	0	Endothelial cells
DUSP6	0	1.01291	0.416	0.1	0	Endothelial cells
HES1	0	1.01019	0.424	0.171	0	Endothelial cells
CNKSR3	0	1.00993	0.314	0.018	0	Endothelial cells
ACVRL1	0	1.00932	0.39	0.025	0	Endothelial cells
RHOJ	0	0.999048	0.348	0.016	0	Endothelial cells
DLC1	0	0.994721	0.4	0.056	0	Endothelial cells
KANK3	0	0.994592	0.35	0.008	0	Endothelial cells
TSHZ2	0	0.99377	0.468	0.081	0	Endothelial cells
ASS1	0	0.992271	0.365	0.092	0	Endothelial cells
GUK1	0	0.989293	0.865	0.627	0	Endothelial cells
MYH9	0	0.98856	0.739	0.378	0	Endothelial cells
TSPAN4	0	0.987853	0.519	0.157	0	Endothelial cells
ARL4A	0	0.987576	0.592	0.238	0	Endothelial cells
MECOM	0	0.987092	0.308	0.003	0	Endothelial cells
TJP1	0	0.985522	0.452	0.095	0	Endothelial cells
RHOC	0	0.981134	0.497	0.208	0	Endothelial cells
NCOA7	0	0.980984	0.446	0.153	0	Endothelial cells
SERPINE1	0	0.977906	0.233	0.046	0	Endothelial cells
RAI14	0	0.97665	0.382	0.042	0	Endothelial cells
EVA1C	0	0.976311	0.391	0.052	0	Endothelial cells
GNAI2	0	0.975635	0.627	0.269	0	Endothelial cells
C1orf54	0	0.970594	0.355	0.074	0	Endothelial cells
TNFRSF1A	0	0.97024	0.586	0.236	0	Endothelial cells
CTGF	0	0.965303	0.457	0.103	0	Endothelial cells
PCAT19	0	0.965189	0.319	0.003	0	Endothelial cells
KLF2	0	0.963059	0.554	0.214	0	Endothelial cells
SHC1	0	0.960328	0.468	0.114	0	Endothelial cells
CD81	0	0.958655	0.561	0.235	0	Endothelial cells
RAPGEF5	0	0.956829	0.32	0.017	0	Endothelial cells
DOCK9	0	0.95557	0.363	0.03	0	Endothelial cells
ACTN1	0	0.953837	0.545	0.221	0	Endothelial cells
RALGAPA2	0	0.951519	0.372	0.04	0	Endothelial cells
CMIP	0	0.951302	0.451	0.089	0	Endothelial cells
PNP	0	0.951035	0.506	0.167	0	Endothelial cells
SEC14L1	0	0.949613	0.519	0.172	0	Endothelial cells
EHD4	0	0.948976	0.464	0.132	0	Endothelial cells
FAM198B	0	0.938738	0.381	0.084	0	Endothelial cells
HLA-DRB1	0	0.937349	0.853	0.387	0	Endothelial cells
SULF2	0	0.929496	0.401	0.056	0	Endothelial cells
RBPMS	0	0.927753	0.485	0.116	0	Endothelial cells
CLDN15	0	0.926667	0.316	0.037	0	Endothelial cells
LAP3	0	0.923925	0.594	0.262	0	Endothelial cells
LAMA4	0	0.921498	0.328	0.063	0	Endothelial cells
TGFBR3	0	0.92038	0.375	0.052	0	Endothelial cells
GPR146	0	0.916186	0.317	0.012	0	Endothelial cells
TNFSF10	0	0.908953	0.614	0.282	0	Endothelial cells
EHD2	0	0.906992	0.438	0.073	0	Endothelial cells
CLIC4	0	0.904071	0.449	0.141	0	Endothelial cells
PDLIM5	0	0.90405	0.547	0.203	0	Endothelial cells
RGS3	0	0.903836	0.284	0.06	0	Endothelial cells
PPIC	0	0.902959	0.537	0.153	0	Endothelial cells
ATP1A1	0	0.901888	0.635	0.324	0	Endothelial cells
SYNPO	0	0.901554	0.312	0.019	0	Endothelial cells
PPFIBP1	0	0.899152	0.429	0.092	0	Endothelial cells
CSRP2	0	0.897797	0.408	0.101	0	Endothelial cells
RASIP1	0	0.88595	0.333	0.018	0	Endothelial cells
PLPP3	0	0.884218	0.384	0.093	0	Endothelial cells
NRP2	0	0.884175	0.325	0.067	0	Endothelial cells
RAPGEF3	0	0.882997	0.318	0.007	0	Endothelial cells
MKL2	0	0.882128	0.366	0.067	0	Endothelial cells
ARHGEF15	0	0.881764	0.321	0.001	0	Endothelial cells
TNS2	0	0.876487	0.363	0.042	0	Endothelial cells
MYO1E	0	0.874801	0.358	0.083	0	Endothelial cells
LAMA5	0	0.873094	0.33	0.041	0	Endothelial cells
CPXM2	0	0.869965	0.314	0.014	0	Endothelial cells
FBLN2	0	0.869955	0.319	0.055	0	Endothelial cells
MAP3K11	0	0.868946	0.429	0.103	0	Endothelial cells
ANXA2	0	0.865803	0.858	0.538	0	Endothelial cells
NUCB1	0	0.864898	0.621	0.298	0	Endothelial cells
IL6ST	0	0.864316	0.62	0.27	0	Endothelial cells
INPP1	0	0.862517	0.394	0.065	0	Endothelial cells
HOXD9	0	0.86025	0.281	0.004	0	Endothelial cells
GFOD1	0	0.853771	0.352	0.039	0	Endothelial cells
NES	0	0.852564	0.287	0.031	0	Endothelial cells
CLIC2	0	0.851377	0.343	0.034	0	Endothelial cells
GALNT18	0	0.848288	0.338	0.018	0	Endothelial cells
ANKRD29	0	0.847479	0.338	0.024	0	Endothelial cells
FEZ2	0	0.84436	0.459	0.149	0	Endothelial cells
ITM2A	0	0.84286	0.64	0.225	0	Endothelial cells
IPO11	0	0.839667	0.345	0.03	0	Endothelial cells
PTTG1IP	0	0.83864	0.592	0.267	0	Endothelial cells
CFH	0	0.838434	0.331	0.057	0	Endothelial cells
UACA	0	0.837924	0.409	0.102	0	Endothelial cells
ASAP1	0	0.835281	0.429	0.111	0	Endothelial cells
JAG1	0	0.833086	0.293	0.07	0	Endothelial cells
JAG2	0	0.832606	0.23	0.011	0	Endothelial cells
XIST	0	0.826453	0.691	0.386	0	Endothelial cells
LAMB1	0	0.822337	0.338	0.049	0	Endothelial cells
TUBB6	0	0.820531	0.418	0.091	0	Endothelial cells
CCDC50	0	0.818778	0.492	0.164	0	Endothelial cells
UGCG	0	0.817067	0.443	0.165	0	Endothelial cells
CYTL1	0	0.816298	0.21	0.003	0	Endothelial cells
MAST4	0	0.816293	0.367	0.094	0	Endothelial cells
EMP2	0	0.815727	0.588	0.227	0	Endothelial cells
GIMAP4	0	0.815594	0.558	0.167	0	Endothelial cells
LUZP1	0	0.814622	0.446	0.121	0	Endothelial cells
MAGI1	0	0.810137	0.319	0.039	0	Endothelial cells
FLNB	0	0.806268	0.418	0.103	0	Endothelial cells
RPS6KA2	0	0.805398	0.335	0.022	0	Endothelial cells
TEK	0	0.804497	0.282	0.001	0	Endothelial cells
CRIM1	0	0.801571	0.35	0.066	0	Endothelial cells
TRIOBP	0	0.80019	0.368	0.073	0	Endothelial cells
UTRN	0	0.799866	0.484	0.176	0	Endothelial cells
ARL15	0	0.798721	0.227	0.032	0	Endothelial cells
ITGB4	0	0.797052	0.312	0.042	0	Endothelial cells
RAC1	0	0.796656	0.824	0.55	0	Endothelial cells
PLEKHG1	0	0.795763	0.317	0.02	0	Endothelial cells
PIK3C2A	0	0.795032	0.372	0.087	0	Endothelial cells
CLEC3B	0	0.793151	0.207	0.011	0	Endothelial cells
MYL12B	0	0.791806	0.887	0.702	0	Endothelial cells
ABCD4	0	0.791756	0.367	0.079	0	Endothelial cells
TXNIP	0	0.790741	0.766	0.522	0	Endothelial cells
RASA4	0	0.790249	0.281	0.024	0	Endothelial cells
MET	0	0.789175	0.301	0.013	0	Endothelial cells
CRYBG3	0	0.787994	0.306	0.039	0	Endothelial cells
LMO2	0	0.787956	0.292	0.018	0	Endothelial cells
MCAM	0	0.787576	0.342	0.055	0	Endothelial cells
PLS3	0	0.780115	0.335	0.066	0	Endothelial cells
C10orf128	0	0.779349	0.315	0.028	0	Endothelial cells
PLK2	0	0.7778	0.404	0.15	0	Endothelial cells
GNAQ	0	0.776816	0.398	0.107	0	Endothelial cells
MSN	0	0.776789	0.638	0.299	0	Endothelial cells
SEPN1	0	0.77518	0.34	0.056	0	Endothelial cells
SERPINB6	0	0.773545	0.467	0.165	0	Endothelial cells
VAT1	0	0.77249	0.456	0.152	0	Endothelial cells
PEA15	0	0.769564	0.541	0.236	0	Endothelial cells
PARVB	0	0.769139	0.411	0.1	0	Endothelial cells
HDAC7	0	0.765796	0.382	0.093	0	Endothelial cells
KIAA0355	0	0.76318	0.331	0.049	0	Endothelial cells
SOX7	0	0.761723	0.238	0.005	0	Endothelial cells
SNAI1	0	0.760196	0.28	0.047	0	Endothelial cells
CD200	0	0.760063	0.282	0.041	0	Endothelial cells
CD40	0	0.758014	0.394	0.087	0	Endothelial cells
EID1	0	0.755555	0.734	0.445	0	Endothelial cells
GIMAP6	0	0.754243	0.349	0.043	0	Endothelial cells
GABARAPL2	0	0.753492	0.694	0.433	0	Endothelial cells
CTSH	0	0.753357	0.53	0.211	0	Endothelial cells
C4orf32	0	0.753076	0.37	0.088	0	Endothelial cells
KIAA1462	0	0.752367	0.274	0.01	0	Endothelial cells
PLEC	0	0.750997	0.438	0.165	0	Endothelial cells
ENTPD1	0	0.750195	0.371	0.091	0	Endothelial cells
LAMC1	0	0.749801	0.345	0.062	0	Endothelial cells
SPNS2	0	0.749226	0.269	0.012	0	Endothelial cells
SASH1	0	0.748685	0.337	0.059	0	Endothelial cells
C7	0	0.747539	0.203	0.011	0	Endothelial cells
SYNE2	0	0.74565	0.586	0.236	0	Endothelial cells
SCARF1	0	0.745161	0.272	0.012	0	Endothelial cells
RALB	0	0.743993	0.384	0.104	0	Endothelial cells
HHEX	0	0.743684	0.284	0.03	0	Endothelial cells
GPIHBP1	0	0.743364	0.201	0.001	0	Endothelial cells
WARS	0	0.741147	0.385	0.147	0	Endothelial cells
HAPLN3	0	0.740575	0.326	0.083	0	Endothelial cells
COX7A1	0	0.740498	0.355	0.066	0	Endothelial cells
ARHGAP31	0	0.738676	0.296	0.031	0	Endothelial cells
IL1R1	0	0.738667	0.28	0.039	0	Endothelial cells
MEOX1	0	0.738177	0.252	0.005	0	Endothelial cells
MEOX2	0	0.734952	0.264	0.014	0	Endothelial cells
ACTN4	0	0.733982	0.578	0.282	0	Endothelial cells
PXN	0	0.731055	0.348	0.066	0	Endothelial cells
SEMA3G	0	0.729747	0.146	0.004	0	Endothelial cells
NFIA	0	0.729144	0.445	0.161	0	Endothelial cells
HSPA12B	0	0.727933	0.258	0.007	0	Endothelial cells
SLC2A3	0	0.727752	0.7	0.363	0	Endothelial cells
KLF7	0	0.72751	0.324	0.054	0	Endothelial cells
TLL1	0	0.726018	0.237	0.003	0	Endothelial cells
MMRN1	0	0.725451	0.155	0.002	0	Endothelial cells
DPYSL2	0	0.723193	0.368	0.093	0	Endothelial cells
EPHB4	0	0.722941	0.275	0.037	0	Endothelial cells
LPCAT4	0	0.722752	0.338	0.074	0	Endothelial cells
FGD5	0	0.718449	0.269	0.009	0	Endothelial cells
FRY	0	0.717843	0.29	0.025	0	Endothelial cells
UPP1	0	0.71739	0.406	0.148	0	Endothelial cells
LIMA1	0	0.716708	0.472	0.175	0	Endothelial cells
S100A13	0	0.714636	0.666	0.249	0	Endothelial cells
TNFAIP1	0	0.71434	0.325	0.057	0	Endothelial cells
CTNND1	0	0.713454	0.385	0.138	0	Endothelial cells
CTNNA1	0	0.710828	0.477	0.208	0	Endothelial cells
TMEM173	0	0.708769	0.496	0.176	0	Endothelial cells
HOXD8	0	0.705795	0.264	0.014	0	Endothelial cells
ARGLU1	0	0.703685	0.647	0.383	0	Endothelial cells
CPNE8	0	0.699112	0.313	0.033	0	Endothelial cells
RHOB	0	0.6969	0.706	0.446	0	Endothelial cells
C8orf4	0	0.695108	0.316	0.096	0	Endothelial cells
CD9	0	0.694798	0.606	0.334	0	Endothelial cells
SHROOM4	0	0.694414	0.249	0.003	0	Endothelial cells
LMNA	0	0.694019	0.852	0.534	0	Endothelial cells
FAM213A	0	0.6914	0.398	0.154	0	Endothelial cells
PHACTR2	0	0.690748	0.42	0.125	0	Endothelial cells
HBEGF	0	0.690085	0.362	0.102	0	Endothelial cells
VCAM1	0	0.68933	0.216	0.044	0	Endothelial cells
APLP2	0	0.686986	0.587	0.306	0	Endothelial cells
PTMS	0	0.686631	0.686	0.385	0	Endothelial cells
A4GALT	0	0.685532	0.303	0.033	0	Endothelial cells
ZEB1	0	0.685163	0.352	0.084	0	Endothelial cells
WASF2	0	0.684162	0.622	0.343	0	Endothelial cells
FILIP1	0	0.684005	0.232	0.027	0	Endothelial cells
S100A10	0	0.682457	0.871	0.64	0	Endothelial cells
VEGFC	0	0.682176	0.196	0.005	0	Endothelial cells
DOC2B	0	0.68189	0.251	0.003	0	Endothelial cells
CTNNB1	0	0.681439	0.461	0.226	0	Endothelial cells
CYR61	0	0.679276	0.5	0.174	0	Endothelial cells
SSFA2	0	0.676587	0.366	0.117	0	Endothelial cells
HTRA1	0	0.67482	0.324	0.074	0	Endothelial cells
NOTCH1	0	0.674344	0.278	0.042	0	Endothelial cells
RP11-536O18.1	0	0.67326	0.197	0.001	0	Endothelial cells
CNRIP1	0	0.67273	0.313	0.044	0	Endothelial cells
RND1	0	0.672616	0.267	0.069	0	Endothelial cells
CTNNAL1	0	0.671462	0.313	0.069	0	Endothelial cells
KTN1	0	0.670502	0.685	0.409	0	Endothelial cells
MAPK3	0	0.669582	0.318	0.075	0	Endothelial cells
ABLIM1	0	0.668536	0.434	0.126	0	Endothelial cells
FKBP9	0	0.667758	0.322	0.075	0	Endothelial cells
TMTC1	0	0.667702	0.259	0.014	0	Endothelial cells
YPEL2	0	0.667087	0.355	0.134	0	Endothelial cells
SLC44A2	0	0.666125	0.407	0.136	0	Endothelial cells
SHE	0	0.665139	0.242	0.003	0	Endothelial cells
PICALM	0	0.66437	0.371	0.125	0	Endothelial cells
FKBP1C	0	0.663989	0.259	0.06	0	Endothelial cells
HLA-DMA	0	0.660456	0.6	0.235	0	Endothelial cells
DOCK6	0	0.659668	0.233	0.018	0	Endothelial cells
CYSTM1	0	0.659528	0.547	0.271	0	Endothelial cells
TPM4	0	0.659307	0.757	0.479	0	Endothelial cells
AFAP1L1	0	0.658838	0.214	0.003	0	Endothelial cells
TMEM109	0	0.657689	0.509	0.229	0	Endothelial cells
ADGRG1	0	0.656764	0.302	0.053	0	Endothelial cells
RGS16	0	0.656638	0.34	0.148	0	Endothelial cells
CDH13	0	0.65637	0.18	0.009	0	Endothelial cells
TSPAN12	0	0.656247	0.258	0.02	0	Endothelial cells
SNTB2	0	0.655578	0.309	0.058	0	Endothelial cells
MARCKSL1	0	0.653074	0.674	0.383	0	Endothelial cells
GAS6	0	0.65275	0.328	0.114	0	Endothelial cells
MIDN	0	0.647752	0.483	0.248	0	Endothelial cells
SPTAN1	0	0.6471	0.451	0.187	0	Endothelial cells
NOS3	0	0.64464	0.22	0.005	0	Endothelial cells
GBP4	0	0.642959	0.335	0.11	0	Endothelial cells
SERTAD1	0	0.642061	0.649	0.412	0	Endothelial cells
ARL2	0	0.641816	0.284	0.09	0	Endothelial cells
DNASE1L3	0	0.641591	0.106	0.006	0	Endothelial cells
HECW2	0	0.641311	0.151	0.005	0	Endothelial cells
TNXB	0	0.64128	0.26	0.023	0	Endothelial cells
FOXP1	0	0.64046	0.553	0.277	0	Endothelial cells
NEAT1	0	0.640411	0.91	0.669	0	Endothelial cells
INHBB	0	0.639422	0.255	0.042	0	Endothelial cells
PLCB1	0	0.638469	0.24	0.025	0	Endothelial cells
ITGB1	0	0.638412	0.71	0.418	0	Endothelial cells
HLA-A	0	0.637857	0.964	0.847	0	Endothelial cells
SH2D3C	0	0.637436	0.271	0.027	0	Endothelial cells
SEMA6A	0	0.637223	0.244	0.016	0	Endothelial cells
ADAMTS4	0	0.636744	0.248	0.045	0	Endothelial cells
PTP4A3	0	0.635953	0.287	0.096	0	Endothelial cells
PPARG	0	0.63557	0.243	0.027	0	Endothelial cells
RASGRP3	0	0.635123	0.212	0.03	0	Endothelial cells
SDCBP	0	0.634971	0.718	0.447	0	Endothelial cells
PTPRG	0	0.634312	0.212	0.034	0	Endothelial cells
2010-09-01	0	0.634134	0.34	0.09	0	Endothelial cells
POLE4	0	0.633659	0.502	0.246	0	Endothelial cells
CDA	0	0.631912	0.204	0.011	0	Endothelial cells
VGLL4	0	0.631871	0.429	0.172	0	Endothelial cells
MMP28	0	0.631389	0.22	0.007	0	Endothelial cells
SNX3	0	0.630637	0.687	0.469	0	Endothelial cells
GIMAP1	0	0.63043	0.242	0.036	0	Endothelial cells
CTTNBP2NL	0	0.628365	0.261	0.048	0	Endothelial cells
CAPNS1	0	0.625821	0.417	0.174	0	Endothelial cells
CEP68	0	0.624915	0.299	0.054	0	Endothelial cells
EFNA1	0	0.62383	0.427	0.153	0	Endothelial cells
IFI16	0	0.623706	0.656	0.329	0	Endothelial cells
PLCB4	0	0.622378	0.244	0.027	0	Endothelial cells
NR2F2	0	0.621265	0.34	0.112	0	Endothelial cells
CLEC1A	0	0.619794	0.232	0.004	0	Endothelial cells
WBP5	0	0.618645	0.382	0.136	0	Endothelial cells
NCKAP1	0	0.618185	0.302	0.088	0	Endothelial cells
FAM110D	0	0.61808	0.204	0.001	0	Endothelial cells
PPP3CA	0	0.617221	0.373	0.113	0	Endothelial cells
SMAGP	0	0.614251	0.293	0.054	0	Endothelial cells
YWHAH	0	0.612801	0.535	0.296	0	Endothelial cells
GATA2	0	0.611114	0.213	0.012	0	Endothelial cells
FERMT2	0	0.608417	0.344	0.085	0	Endothelial cells
LAMB2	0	0.608279	0.315	0.089	0	Endothelial cells
MOB2	0	0.60762	0.379	0.13	0	Endothelial cells
HIP1	0	0.60743	0.313	0.068	0	Endothelial cells
RP11-382A20.3	0	0.606825	0.276	0.049	0	Endothelial cells
CDC42BPA	0	0.606453	0.26	0.05	0	Endothelial cells
NAA38	0	0.605724	0.521	0.3	0	Endothelial cells
MYC	0	0.605584	0.52	0.243	0	Endothelial cells
KIFC3	0	0.605561	0.25	0.036	0	Endothelial cells
FAM65A	0	0.604921	0.273	0.048	0	Endothelial cells
SHANK3	0	0.604826	0.175	0.001	0	Endothelial cells
TAGLN2	0	0.604154	0.865	0.694	0	Endothelial cells
GRB10	0	0.603455	0.212	0.023	0	Endothelial cells
FSTL1	0	0.601409	0.373	0.083	0	Endothelial cells
DAAM1	0	0.600603	0.33	0.133	0	Endothelial cells
BCAP29	0	0.599531	0.435	0.201	0	Endothelial cells
MYL12A	0	0.5993	0.909	0.752	0	Endothelial cells
KLF9	0	0.598328	0.404	0.139	0	Endothelial cells
PROCR	0	0.597238	0.263	0.037	0	Endothelial cells
NDUFA8	0	0.595553	0.416	0.196	0	Endothelial cells
BCL6B	0	0.595167	0.197	0.001	0	Endothelial cells
CAPZA2	0	0.594999	0.573	0.342	0	Endothelial cells
PON2	0	0.594332	0.389	0.172	0	Endothelial cells
CASKIN2	0	0.594207	0.216	0.015	0	Endothelial cells
SGK1	0	0.593997	0.428	0.182	0	Endothelial cells
FAM43A	0	0.593985	0.235	0.036	0	Endothelial cells
LTC4S	0	0.593662	0.235	0.059	0	Endothelial cells
PDE2A	0	0.593566	0.217	0.004	0	Endothelial cells
AKR1C3	0	0.593161	0.212	0.027	0	Endothelial cells
GPRC5B	0	0.592699	0.226	0.025	0	Endothelial cells
VAMP3	0	0.59138	0.414	0.165	0	Endothelial cells
AP1S2	0	0.588196	0.448	0.174	0	Endothelial cells
CNTNAP3B	0	0.58803	0.203	0.004	0	Endothelial cells
TSPAN9	0	0.58727	0.276	0.056	0	Endothelial cells
FOXC1	0	0.586827	0.221	0.018	0	Endothelial cells
PCGF2	0	0.584973	0.266	0.052	0	Endothelial cells
CARHSP1	0	0.583527	0.462	0.233	0	Endothelial cells
PKIG	0	0.583423	0.343	0.124	0	Endothelial cells
MPZL2	0	0.581966	0.213	0.039	0	Endothelial cells
F8	0	0.581795	0.217	0.023	0	Endothelial cells
TMOD3	0	0.581314	0.471	0.219	0	Endothelial cells
HLA-B	0	0.580895	0.988	0.874	0	Endothelial cells
COL18A1	0	0.580562	0.41	0.102	0	Endothelial cells
HIPK3	0	0.580558	0.308	0.087	0	Endothelial cells
DYNC1LI2	0	0.578687	0.405	0.16	0	Endothelial cells
MGST3	0	0.578394	0.73	0.465	0	Endothelial cells
PRMT1	0	0.57828	0.493	0.266	0	Endothelial cells
GRAMD1A	0	0.577845	0.352	0.127	0	Endothelial cells
PTPN14	0	0.577637	0.248	0.046	0	Endothelial cells
LRRFIP1	0	0.575838	0.701	0.472	0	Endothelial cells
NPR1	0	0.575041	0.215	0.002	0	Endothelial cells
ITPRIP	0	0.575035	0.272	0.061	0	Endothelial cells
CYP1B1	0	0.574807	0.19	0.052	0	Endothelial cells
MEF2A	0	0.573795	0.321	0.124	0	Endothelial cells
MATN2	0	0.573198	0.215	0.02	0	Endothelial cells
CEBPD	0	0.573162	0.462	0.242	0	Endothelial cells
TANC1	0	0.57306	0.24	0.05	0	Endothelial cells
LHX6	0	0.572115	0.193	0.003	0	Endothelial cells
PMP22	0	0.572051	0.424	0.17	0	Endothelial cells
PLXNA2	0	0.571018	0.211	0.013	0	Endothelial cells
GPR4	0	0.570517	0.221	0.015	0	Endothelial cells
LGALS3	0	0.569198	0.74	0.479	0	Endothelial cells
FNIP2	0	0.568625	0.278	0.065	0	Endothelial cells
GIMAP8	0	0.567977	0.236	0.024	0	Endothelial cells
STAB1	0	0.56794	0.3	0.049	0	Endothelial cells
PTPN12	0	0.567446	0.305	0.1	0	Endothelial cells
GFOD2	0	0.56502	0.271	0.052	0	Endothelial cells
YWHAE	0	0.564418	0.681	0.442	0	Endothelial cells
ELOVL1	0	0.562375	0.411	0.18	0	Endothelial cells
HSD17B11	0	0.562167	0.449	0.176	0	Endothelial cells
NKTR	0	0.561591	0.495	0.257	0	Endothelial cells
GRASP	0	0.561501	0.229	0.042	0	Endothelial cells
CSF2RB	0	0.561228	0.197	0.025	0	Endothelial cells
SPHK1	0	0.561197	0.282	0.083	0	Endothelial cells
PXDN	0	0.560361	0.22	0.057	0	Endothelial cells
AK1	0	0.560358	0.311	0.108	0	Endothelial cells
RGL2	0	0.560032	0.333	0.113	0	Endothelial cells
ARHGEF12	0	0.55998	0.286	0.086	0	Endothelial cells
EPHA4	0	0.558649	0.242	0.024	0	Endothelial cells
ACE	0	0.558515	0.142	0.016	0	Endothelial cells
DCHS1	0	0.557979	0.214	0.012	0	Endothelial cells
LRRC32	0	0.556691	0.242	0.036	0	Endothelial cells
MT-CYB	0	0.556	0.983	0.959	0	Endothelial cells
XAF1	0	0.555998	0.404	0.175	0	Endothelial cells
EPHX1	0	0.554964	0.43	0.183	0	Endothelial cells
C2CD4B	0	0.554343	0.16	0.004	0	Endothelial cells
ALPL	0	0.55418	0.114	0.017	0	Endothelial cells
BCAR1	0	0.554065	0.238	0.035	0	Endothelial cells
HLX	0	0.553577	0.192	0.018	0	Endothelial cells
NUDT14	0	0.553135	0.367	0.15	0	Endothelial cells
RASAL2	0	0.55135	0.268	0.058	0	Endothelial cells
BNIP2	0	0.551145	0.449	0.197	0	Endothelial cells
CD300LG	0	0.55062	0.1	0.001	0	Endothelial cells
LAPTM4A	0	0.549002	0.773	0.482	0	Endothelial cells
PROS1	0	0.54776	0.255	0.038	0	Endothelial cells
NID1	0	0.547709	0.224	0.051	0	Endothelial cells
FZD6	0	0.547451	0.222	0.023	0	Endothelial cells
MANSC1	0	0.547021	0.259	0.04	0	Endothelial cells
ADM	0	0.54559	0.227	0.069	0	Endothelial cells
GNS	0	0.545093	0.343	0.122	0	Endothelial cells
ELMO1	0	0.54428	0.35	0.091	0	Endothelial cells
MYO10	0	0.54372	0.208	0.051	0	Endothelial cells
TMSB10	0	0.543661	0.986	0.972	0	Endothelial cells
NPC2	0	0.542045	0.702	0.453	0	Endothelial cells
IFNGR1	0	0.54172	0.428	0.213	0	Endothelial cells
AOC3	0	0.541292	0.23	0.021	0	Endothelial cells
CCDC178	0	0.541194	0.203	0.001	0	Endothelial cells
RAB3C	0	0.538844	0.18	0.001	0	Endothelial cells
STMN1	0	0.537769	0.516	0.264	0	Endothelial cells
PPM1F	0	0.537372	0.23	0.028	0	Endothelial cells
FAM171A1	0	0.536008	0.179	0.011	0	Endothelial cells
PCDH12	0	0.535511	0.166	0.008	0	Endothelial cells
FAM129B	0	0.535221	0.248	0.058	0	Endothelial cells
LAPTM4B	0	0.535088	0.293	0.083	0	Endothelial cells
BAG3	0	0.534881	0.477	0.232	0	Endothelial cells
FRYL	0	0.534609	0.343	0.118	0	Endothelial cells
CLTA	0	0.534587	0.681	0.448	0	Endothelial cells
IFI44L	0	0.534116	0.397	0.176	0	Endothelial cells
MACF1	0	0.533893	0.459	0.233	0	Endothelial cells
FIS1	0	0.533853	0.679	0.448	0	Endothelial cells
BAZ2B	0	0.533498	0.343	0.135	0	Endothelial cells
GRN	0	0.533147	0.674	0.334	0	Endothelial cells
MAP4	0	0.532271	0.395	0.188	0	Endothelial cells
CFAP20	0	0.530185	0.284	0.115	0	Endothelial cells
CRK	0	0.529851	0.35	0.127	0	Endothelial cells
HOXB7	0	0.529759	0.242	0.039	0	Endothelial cells
FBXO31	0	0.528522	0.231	0.035	0	Endothelial cells
C9orf3	0	0.52797	0.243	0.059	0	Endothelial cells
LTBR	0	0.527457	0.389	0.177	0	Endothelial cells
S100A6	0	0.526293	0.908	0.724	0	Endothelial cells
TSPAN18	0	0.525564	0.195	0.006	0	Endothelial cells
NDST1	0	0.524733	0.225	0.04	0	Endothelial cells
KBTBD2	0	0.524128	0.262	0.066	0	Endothelial cells
LPCAT2	0	0.523774	0.223	0.05	0	Endothelial cells
MYO1C	0	0.521997	0.311	0.119	0	Endothelial cells
TPM3	0	0.52192	0.779	0.575	0	Endothelial cells
MYL6	0	0.521022	0.963	0.875	0	Endothelial cells
TAOK2	0	0.520514	0.21	0.039	0	Endothelial cells
SLC39A1	0	0.519834	0.431	0.224	0	Endothelial cells
TMEM2	0	0.517698	0.452	0.2	0	Endothelial cells
PLEKHA1	0	0.517698	0.322	0.107	0	Endothelial cells
ICA1	0	0.51745	0.365	0.128	0	Endothelial cells
ATP8B1	0	0.516546	0.228	0.049	0	Endothelial cells
TMCC3	0	0.516534	0.206	0.016	0	Endothelial cells
TPD52L1	0	0.516066	0.325	0.105	0	Endothelial cells
CPLX1	0	0.51601	0.192	0.015	0	Endothelial cells
FAM13C	0	0.515651	0.202	0.021	0	Endothelial cells
NR5A2	0	0.515575	0.187	0.004	0	Endothelial cells
SNRK	0	0.514275	0.314	0.09	0	Endothelial cells
APBB2	0	0.513879	0.243	0.052	0	Endothelial cells
PTPRK	0	0.513674	0.288	0.119	0	Endothelial cells
PDIA5	0	0.512778	0.233	0.048	0	Endothelial cells
ADAMTS6	0	0.511815	0.125	0.014	0	Endothelial cells
RPGR	0	0.511083	0.236	0.042	0	Endothelial cells
AIF1L	0	0.510991	0.183	0.024	0	Endothelial cells
AVPR2	0	0.510093	0.178	0	0	Endothelial cells
AHR	0	0.509859	0.403	0.167	0	Endothelial cells
PIK3C2B	0	0.508811	0.193	0.02	0	Endothelial cells
YES1	0	0.508527	0.295	0.095	0	Endothelial cells
RSU1	0	0.508089	0.407	0.189	0	Endothelial cells
FLT4	0	0.507527	0.156	0.001	0	Endothelial cells
SEMA6B	0	0.506363	0.186	0.009	0	Endothelial cells
NOV	0	0.503214	0.121	0.012	0	Endothelial cells
DYSF	0	0.50216	0.169	0.016	0	Endothelial cells
TSPAN6	0	0.501917	0.27	0.077	0	Endothelial cells
APOL1	0	0.501797	0.25	0.056	0	Endothelial cells
DOCK4	0	0.501358	0.203	0.034	0	Endothelial cells
SPAG9	0	0.500423	0.398	0.19	0	Endothelial cells
CDC42BPB	0	0.500263	0.237	0.052	0	Endothelial cells
ARHGAP23	0	0.499944	0.186	0.008	0	Endothelial cells
ZFYVE21	0	0.499759	0.357	0.159	0	Endothelial cells
QKI	0	0.499016	0.325	0.128	0	Endothelial cells
SEMA3F	0	0.49849	0.152	0.011	0	Endothelial cells
MCF2L	0	0.498407	0.175	0.022	0	Endothelial cells
MAP4K4	0	0.498217	0.299	0.098	0	Endothelial cells
RBMS2	0	0.498062	0.239	0.032	0	Endothelial cells
STARD13	0	0.494653	0.206	0.039	0	Endothelial cells
PCSK5	0	0.492746	0.117	0.016	0	Endothelial cells
HIF1A	0	0.492468	0.452	0.231	0	Endothelial cells
SPTLC2	0	0.491796	0.328	0.13	0	Endothelial cells
HSD17B12	0	0.490998	0.336	0.154	0	Endothelial cells
CST3	0	0.49092	0.881	0.429	0	Endothelial cells
SERINC3	0	0.490062	0.484	0.258	0	Endothelial cells
MLLT4	0	0.488951	0.277	0.073	0	Endothelial cells
TUSC3	0	0.488746	0.272	0.088	0	Endothelial cells
NAV1	0	0.488068	0.214	0.041	0	Endothelial cells
TSPAN3	0	0.487978	0.389	0.189	0	Endothelial cells
RP11-467L13.7	0	0.485456	0.177	0.046	0	Endothelial cells
HERC2	0	0.484989	0.296	0.111	0	Endothelial cells
FBN1	0	0.484016	0.254	0.054	0	Endothelial cells
HLA-C	0	0.482412	0.977	0.875	0	Endothelial cells
PLCG2	0	0.482073	0.196	0.05	0	Endothelial cells
GSDMD	0	0.48199	0.415	0.203	0	Endothelial cells
CCDC69	0	0.47908	0.309	0.075	0	Endothelial cells
SPRY4	0	0.479031	0.142	0.022	0	Endothelial cells
LRRC8A	0	0.47733	0.224	0.055	0	Endothelial cells
NGFRAP1	0	0.477316	0.484	0.239	0	Endothelial cells
ATP11C	0	0.477255	0.225	0.039	0	Endothelial cells
ADD1	0	0.475441	0.337	0.145	0	Endothelial cells
MSRB3	0	0.474811	0.281	0.061	0	Endothelial cells
F2RL3	0	0.474	0.108	0.002	0	Endothelial cells
CCDC3	0	0.473979	0.19	0.021	0	Endothelial cells
PML	0	0.473897	0.301	0.11	0	Endothelial cells
SH3BGRL2	0	0.473816	0.192	0.01	0	Endothelial cells
SUN1	0	0.473642	0.298	0.115	0	Endothelial cells
PDGFB	0	0.47329	0.152	0.02	0	Endothelial cells
NFE2L1	0	0.471672	0.28	0.093	0	Endothelial cells
LIMCH1	0	0.471315	0.237	0.088	0	Endothelial cells
CX3CL1	0	0.471135	0.198	0.046	0	Endothelial cells
ARAP3	0	0.470772	0.171	0.005	0	Endothelial cells
CCL23	0	0.470583	0.129	0.007	0	Endothelial cells
TRIM47	0	0.469357	0.272	0.091	0	Endothelial cells
MAPK11	0	0.469121	0.181	0.01	0	Endothelial cells
TTC28	0	0.468736	0.199	0.027	0	Endothelial cells
MYOF	0	0.467961	0.278	0.1	0	Endothelial cells
GIPC2	0	0.465229	0.181	0.008	0	Endothelial cells
ASRGL1	0	0.462695	0.208	0.054	0	Endothelial cells
TMEM184B	0	0.462239	0.23	0.065	0	Endothelial cells
USHBP1	0	0.460135	0.158	0.001	0	Endothelial cells
CSGALNACT1	0	0.459844	0.211	0.03	0	Endothelial cells
PLSCR4	0	0.45958	0.209	0.037	0	Endothelial cells
FDPS	0	0.458565	0.476	0.243	0	Endothelial cells
EDNRB	0	0.457917	0.147	0.032	0	Endothelial cells
SERTAD4-AS1	0	0.45608	0.18	0.027	0	Endothelial cells
RUNDC3B	0	0.455103	0.149	0.002	0	Endothelial cells
CD63	0	0.454792	0.848	0.565	0	Endothelial cells
FOSL2	0	0.454395	0.448	0.215	0	Endothelial cells
MPDZ	0	0.454252	0.198	0.031	0	Endothelial cells
ITPKC	0	0.452516	0.201	0.049	0	Endothelial cells
TBCD	0	0.451602	0.237	0.083	0	Endothelial cells
TACR1	0	0.451431	0.167	0.004	0	Endothelial cells
ROCK2	0	0.451411	0.26	0.084	0	Endothelial cells
ADGRL2	0	0.450369	0.162	0.014	0	Endothelial cells
PLLP	0	0.449184	0.115	0.016	0	Endothelial cells
EBF1	0	0.449035	0.26	0.056	0	Endothelial cells
TEAD4	0	0.447237	0.194	0.038	0	Endothelial cells
PCDH1	0	0.445919	0.191	0.024	0	Endothelial cells
CSNK1E	0	0.44578	0.297	0.126	0	Endothelial cells
SLC25A25	0	0.445677	0.264	0.092	0	Endothelial cells
CEP112	0	0.443268	0.196	0.014	0	Endothelial cells
ADRB2	0	0.442909	0.205	0.045	0	Endothelial cells
PKN3	0	0.44282	0.171	0.007	0	Endothelial cells
NHSL2	0	0.442816	0.24	0.05	0	Endothelial cells
DHRS7B	0	0.441939	0.243	0.069	0	Endothelial cells
FLI1	0	0.441224	0.325	0.095	0	Endothelial cells
TMEM47	0	0.441163	0.186	0.036	0	Endothelial cells
CALML4	0	0.43969	0.17	0.014	0	Endothelial cells
LXN	0	0.439554	0.218	0.061	0	Endothelial cells
MFNG	0	0.439249	0.303	0.081	0	Endothelial cells
EGLN1	0	0.438797	0.234	0.063	0	Endothelial cells
IKBIP	0	0.436905	0.316	0.116	0	Endothelial cells
DPYSL3	0	0.436656	0.22	0.04	0	Endothelial cells
SLC35G2	0	0.435778	0.17	0.011	0	Endothelial cells
EPB41L4A	0	0.435174	0.191	0.023	0	Endothelial cells
ATN1	0	0.434951	0.242	0.081	0	Endothelial cells
BMX	0	0.434856	0.139	0	0	Endothelial cells
HLA-DRA	0	0.433618	0.816	0.365	0	Endothelial cells
BCR	0	0.432054	0.197	0.028	0	Endothelial cells
IL18BP	0	0.431856	0.215	0.049	0	Endothelial cells
TSPAN13	0	0.431766	0.5	0.22	0	Endothelial cells
FES	0	0.430036	0.202	0.041	0	Endothelial cells
SVIL	0	0.429877	0.263	0.105	0	Endothelial cells
C10orf11	0	0.429836	0.221	0.056	0	Endothelial cells
FAM84B	0	0.429725	0.203	0.048	0	Endothelial cells
AGRN	0	0.429112	0.184	0.06	0	Endothelial cells
IGFBP2	0	0.428382	0.208	0.054	0	Endothelial cells
HSPB1	0	0.42767	0.903	0.583	0	Endothelial cells
HRH1	0	0.427625	0.181	0.015	0	Endothelial cells
HPCAL1	0	0.426391	0.373	0.176	0	Endothelial cells
MIR22HG	0	0.42638	0.276	0.104	0	Endothelial cells
PEF1	0	0.42593	0.385	0.181	0	Endothelial cells
FNBP1L	0	0.424939	0.252	0.098	0	Endothelial cells
CPNE2	0	0.424481	0.198	0.039	0	Endothelial cells
GINM1	0	0.423675	0.398	0.2	0	Endothelial cells
CHSY1	0	0.421567	0.227	0.062	0	Endothelial cells
ZNF521	0	0.421372	0.173	0.018	0	Endothelial cells
DLL1	0	0.421352	0.135	0.014	0	Endothelial cells
SORBS3	0	0.420264	0.353	0.151	0	Endothelial cells
PTPRE	0	0.419218	0.289	0.116	0	Endothelial cells
LRRC1	0	0.418326	0.177	0.033	0	Endothelial cells
C1orf115	0	0.417824	0.183	0.019	0	Endothelial cells
ACACB	0	0.41723	0.161	0.015	0	Endothelial cells
GIT1	0	0.416111	0.186	0.031	0	Endothelial cells
RAPGEF4	0	0.415616	0.143	0.004	0	Endothelial cells
FILIP1L	0	0.414238	0.309	0.102	0	Endothelial cells
TNFAIP8L1	0	0.414051	0.158	0.031	0	Endothelial cells
RP4-575N6.4	0	0.413137	0.153	0.004	0	Endothelial cells
SLC39A10	0	0.412118	0.237	0.082	0	Endothelial cells
NOVA2	0	0.412056	0.152	0	0	Endothelial cells
CMTM8	0	0.411966	0.261	0.085	0	Endothelial cells
MSX1	0	0.409851	0.148	0.013	0	Endothelial cells
ELN	0	0.409478	0.207	0.044	0	Endothelial cells
SMAD9	0	0.409316	0.163	0.008	0	Endothelial cells
FGD4	0	0.408804	0.199	0.052	0	Endothelial cells
RBP5	0	0.408397	0.17	0.026	0	Endothelial cells
UBTD1	0	0.405848	0.19	0.051	0	Endothelial cells
PLA1A	0	0.405814	0.114	0.008	0	Endothelial cells
TJP2	0	0.404948	0.187	0.039	0	Endothelial cells
SH3TC1	0	0.404715	0.166	0.046	0	Endothelial cells
DBN1	0	0.40452	0.242	0.086	0	Endothelial cells
FLOT2	0	0.404235	0.318	0.127	0	Endothelial cells
STXBP1	0	0.403934	0.182	0.027	0	Endothelial cells
MMP2	0	0.403771	0.242	0.075	0	Endothelial cells
ABLIM3	0	0.401198	0.167	0.018	0	Endothelial cells
PIEZO1	0	0.401025	0.198	0.056	0	Endothelial cells
MIER2	0	0.400626	0.174	0.035	0	Endothelial cells
SLK	0	0.400472	0.243	0.089	0	Endothelial cells
IFIT3	0	0.399988	0.247	0.094	0	Endothelial cells
RBMS1	0	0.39943	0.439	0.223	0	Endothelial cells
MMP15	0	0.397854	0.146	0.009	0	Endothelial cells
PRKD2	0	0.397373	0.242	0.073	0	Endothelial cells
PINK1	0	0.39672	0.182	0.049	0	Endothelial cells
DOCK1	0	0.396464	0.195	0.047	0	Endothelial cells
FCHO2	0	0.395468	0.197	0.058	0	Endothelial cells
MLXIP	0	0.395019	0.253	0.087	0	Endothelial cells
RELL1	0	0.394756	0.199	0.043	0	Endothelial cells
G6PC3	0	0.394156	0.256	0.103	0	Endothelial cells
MIR222HG	0	0.393836	0.176	0.034	0	Endothelial cells
ITGA1	0	0.393422	0.218	0.064	0	Endothelial cells
CD109	0	0.392599	0.181	0.036	0	Endothelial cells
ANGPTL2	0	0.392486	0.166	0.037	0	Endothelial cells
LRCH1	0	0.392482	0.222	0.06	0	Endothelial cells
FXYD5	0	0.391659	0.829	0.595	0	Endothelial cells
ZNF667-AS1	0	0.390144	0.222	0.064	0	Endothelial cells
ATXN3	0	0.390121	0.276	0.114	0	Endothelial cells
OAF	0	0.387756	0.176	0.043	0	Endothelial cells
ABCB1	0	0.386026	0.156	0.017	0	Endothelial cells
NREP	0	0.384186	0.216	0.062	0	Endothelial cells
CLIC5	0	0.38341	0.125	0.014	0	Endothelial cells
LEPR	0	0.38274	0.155	0.017	0	Endothelial cells
TEAD2	0	0.382267	0.218	0.06	0	Endothelial cells
APOL3	0	0.381975	0.244	0.081	0	Endothelial cells
CARD8	0	0.3809	0.264	0.087	0	Endothelial cells
THSD1	0	0.380473	0.135	0.004	0	Endothelial cells
SAV1	0	0.379262	0.232	0.083	0	Endothelial cells
DIAPH2	0	0.379041	0.213	0.054	0	Endothelial cells
HRCT1	0	0.378781	0.131	0.007	0	Endothelial cells
EXOC6	0	0.377829	0.204	0.056	0	Endothelial cells
PLOD3	0	0.37737	0.257	0.099	0	Endothelial cells
TNFRSF10C	0	0.374249	0.114	0.012	0	Endothelial cells
CADPS2	0	0.373997	0.182	0.047	0	Endothelial cells
EFNB1	0	0.370386	0.15	0.03	0	Endothelial cells
LOXL2	0	0.368518	0.174	0.035	0	Endothelial cells
OSMR	0	0.367606	0.185	0.044	0	Endothelial cells
HLA-DRB5	0	0.367414	0.719	0.292	0	Endothelial cells
HOXD1	0	0.36683	0.137	0.002	0	Endothelial cells
ABCG1	0	0.364202	0.245	0.083	0	Endothelial cells
LYL1	0	0.363946	0.164	0.023	0	Endothelial cells
EXOC3L2	0	0.363484	0.113	0.001	0	Endothelial cells
SLC27A3	0	0.363025	0.183	0.055	0	Endothelial cells
ZNF608	0	0.362767	0.142	0.021	0	Endothelial cells
ARRB1	0	0.361906	0.19	0.047	0	Endothelial cells
FRMD4B	0	0.361453	0.284	0.117	0	Endothelial cells
MID1	0	0.361283	0.15	0.015	0	Endothelial cells
NEURL1B	0	0.35967	0.154	0.024	0	Endothelial cells
ABI3	0	0.35897	0.265	0.086	0	Endothelial cells
ETS1	0	0.357465	0.316	0.125	0	Endothelial cells
LRP6	0	0.356948	0.152	0.033	0	Endothelial cells
NXN	0	0.356662	0.16	0.015	0	Endothelial cells
DST	0	0.356329	0.309	0.131	0	Endothelial cells
PPM1D	0	0.355983	0.238	0.082	0	Endothelial cells
KIAA1683	0	0.355165	0.159	0.039	0	Endothelial cells
MYO5C	0	0.355135	0.169	0.038	0	Endothelial cells
OLFML2A	0	0.353906	0.163	0.032	0	Endothelial cells
ST6GALNAC3	0	0.353226	0.123	0.004	0	Endothelial cells
TNS1	0	0.352355	0.214	0.059	0	Endothelial cells
TCF7L1	0	0.352334	0.162	0.035	0	Endothelial cells
RBFOX2	0	0.350226	0.207	0.067	0	Endothelial cells
RHOU	0	0.349905	0.156	0.032	0	Endothelial cells
LRP5	0	0.348783	0.151	0.031	0	Endothelial cells
GNAI1	0	0.348013	0.136	0.032	0	Endothelial cells
CARD10	0	0.347005	0.137	0.005	0	Endothelial cells
EOGT	0	0.345145	0.146	0.028	0	Endothelial cells
LIPA	0	0.344349	0.321	0.125	0	Endothelial cells
GAS2L1	0	0.344176	0.186	0.059	0	Endothelial cells
PPP2R5A	0	0.34353	0.256	0.096	0	Endothelial cells
EXOC3L1	0	0.34311	0.1	0.009	0	Endothelial cells
PGM5	0	0.342839	0.139	0.009	0	Endothelial cells
SSH1	0	0.342461	0.17	0.042	0	Endothelial cells
DGKH	0	0.341759	0.162	0.045	0	Endothelial cells
VCAN	0	0.341758	0.29	0.093	0	Endothelial cells
RIMKLB	0	0.341678	0.152	0.034	0	Endothelial cells
ENDOD1	0	0.339601	0.213	0.073	0	Endothelial cells
CCM2L	0	0.33955	0.121	0.001	0	Endothelial cells
DAB2IP	0	0.339116	0.152	0.02	0	Endothelial cells
LRRC8C	0	0.33833	0.19	0.044	0	Endothelial cells
ITGA9	0	0.338306	0.115	0.007	0	Endothelial cells
RGS12	0	0.337723	0.155	0.037	0	Endothelial cells
ELOVL7	0	0.337394	0.129	0.003	0	Endothelial cells
RBMS3	0	0.337248	0.195	0.048	0	Endothelial cells
AFAP1	0	0.335659	0.19	0.046	0	Endothelial cells
PAM	0	0.335225	0.243	0.088	0	Endothelial cells
CDC42EP2	0	0.334892	0.154	0.035	0	Endothelial cells
SERPING1	0	0.334455	0.565	0.215	0	Endothelial cells
AMOTL1	0	0.333908	0.154	0.026	0	Endothelial cells
GALNT15	0	0.332609	0.118	0.004	0	Endothelial cells
PRKD3	0	0.331124	0.201	0.067	0	Endothelial cells
LINC01116	0	0.330779	0.18	0.039	0	Endothelial cells
PIR	0	0.330633	0.165	0.035	0	Endothelial cells
TNFRSF10B	0	0.330309	0.204	0.07	0	Endothelial cells
FAM219A	0	0.328482	0.145	0.023	0	Endothelial cells
MSRA	0	0.328222	0.241	0.088	0	Endothelial cells
TGFB1I1	0	0.328191	0.292	0.093	0	Endothelial cells
NT5E	0	0.327504	0.154	0.028	0	Endothelial cells
DNM3	0	0.325078	0.125	0.006	0	Endothelial cells
RAPGEF2	0	0.324768	0.154	0.041	0	Endothelial cells
ZNF467	0	0.324459	0.132	0.026	0	Endothelial cells
SH2B3	0	0.324151	0.179	0.051	0	Endothelial cells
CAMSAP2	0	0.323691	0.175	0.047	0	Endothelial cells
PPP1R13B	0	0.323689	0.134	0.026	0	Endothelial cells
KLHL3	0	0.322474	0.119	0.007	0	Endothelial cells
RSPO3	0	0.32245	0.116	0.017	0	Endothelial cells
KIAA1671	0	0.322095	0.163	0.035	0	Endothelial cells
CADM3-AS1	0	0.32118	0.103	0	0	Endothelial cells
MLKL	0	0.319333	0.16	0.038	0	Endothelial cells
SMIM10	0	0.318827	0.159	0.025	0	Endothelial cells
DNASE1L1	0	0.318803	0.178	0.048	0	Endothelial cells
EPB41L3	0	0.3179	0.169	0.052	0	Endothelial cells
FMNL3	0	0.317418	0.167	0.044	0	Endothelial cells
SLFN5	0	0.315987	0.338	0.147	0	Endothelial cells
TESC	0	0.314837	0.206	0.057	0	Endothelial cells
GGT5	0	0.314597	0.235	0.073	0	Endothelial cells
PLEKHO2	0	0.313525	0.165	0.047	0	Endothelial cells
STIM2	0	0.313275	0.207	0.067	0	Endothelial cells
NOL4L	0	0.313056	0.15	0.041	0	Endothelial cells
STARD9	0	0.312377	0.124	0.016	0	Endothelial cells
DAB2	0	0.311995	0.36	0.121	0	Endothelial cells
KCNN3	0	0.310794	0.104	0.007	0	Endothelial cells
CCDC68	0	0.310633	0.115	0.003	0	Endothelial cells
MYRIP	0	0.310624	0.111	0.002	0	Endothelial cells
CD79B	0	0.308725	0.238	0.058	0	Endothelial cells
PITPNC1	0	0.308544	0.25	0.085	0	Endothelial cells
CNTLN	0	0.308345	0.166	0.045	0	Endothelial cells
RASGRF2	0	0.307585	0.116	0.008	0	Endothelial cells
RAB11FIP5	0	0.307254	0.139	0.021	0	Endothelial cells
NUDCD1	0	0.306835	0.18	0.051	0	Endothelial cells
FAT4	0	0.306519	0.106	0.006	0	Endothelial cells
ZBTB16	0	0.303302	0.186	0.049	0	Endothelial cells
TRIB2	0	0.302022	0.192	0.058	0	Endothelial cells
SLC10A6	0	0.301193	0.105	0.002	0	Endothelial cells
F2R	0	0.300005	0.221	0.07	0	Endothelial cells
GATA2-AS1	0	0.299417	0.122	0.009	0	Endothelial cells
FAM101B	0	0.298542	0.113	0.015	0	Endothelial cells
BAALC	0	0.296291	0.124	0.005	0	Endothelial cells
MAP3K3	0	0.296205	0.169	0.047	0	Endothelial cells
AKT3	0	0.295035	0.18	0.041	0	Endothelial cells
BTBD3	0	0.293704	0.121	0.024	0	Endothelial cells
ATOH8	0	0.292401	0.101	0.006	0	Endothelial cells
CHST7	0	0.290914	0.152	0.033	0	Endothelial cells
C1QTNF1	0	0.290801	0.187	0.044	0	Endothelial cells
IRAK3	0	0.289232	0.159	0.037	0	Endothelial cells
LATS2	0	0.289083	0.159	0.04	0	Endothelial cells
CASP10	0	0.287093	0.132	0.023	0	Endothelial cells
NEDD4	0	0.285918	0.131	0.025	0	Endothelial cells
TECPR1	0	0.284317	0.148	0.037	0	Endothelial cells
TMEM44	0	0.284217	0.107	0.013	0	Endothelial cells
PTPRN2	0	0.284148	0.162	0.042	0	Endothelial cells
WWC2	0	0.283984	0.144	0.038	0	Endothelial cells
KLF11	0	0.282349	0.15	0.038	0	Endothelial cells
RNF122	0	0.282221	0.121	0.017	0	Endothelial cells
SYBU	0	0.279261	0.134	0.029	0	Endothelial cells
RP4-549L20.3	0	0.278353	0.109	0.016	0	Endothelial cells
CTTNBP2	0	0.278268	0.105	0.008	0	Endothelial cells
FAM89A	0	0.277908	0.11	0.01	0	Endothelial cells
SORBS2	0	0.276711	0.234	0.074	0	Endothelial cells
GULP1	0	0.276076	0.147	0.035	0	Endothelial cells
ZNF366	0	0.274417	0.106	0.002	0	Endothelial cells
ASAP2	0	0.274065	0.11	0.02	0	Endothelial cells
ANKRD65	0	0.273689	0.116	0.018	0	Endothelial cells
VASH1	0	0.27237	0.112	0.024	0	Endothelial cells
RPH3AL	0	0.271488	0.124	0.019	0	Endothelial cells
SLCO4A1	0	0.270908	0.124	0.016	0	Endothelial cells
ATP11A	0	0.26903	0.128	0.028	0	Endothelial cells
TDRP	0	0.26812	0.113	0.02	0	Endothelial cells
PEAR1	0	0.268032	0.102	0.013	0	Endothelial cells
IL15	0	0.266606	0.144	0.035	0	Endothelial cells
ITGA3	0	0.265631	0.137	0.036	0	Endothelial cells
ICAM4	0	0.264108	0.113	0.018	0	Endothelial cells
EBF3	0	0.263768	0.101	0.003	0	Endothelial cells
LAYN	0	0.262422	0.174	0.046	0	Endothelial cells
LHFP	0	0.261094	0.424	0.115	0	Endothelial cells
ADARB1	0	0.257438	0.108	0.02	0	Endothelial cells
HOXB4	0	0.256405	0.148	0.035	0	Endothelial cells
SEMA4C	0	0.251301	0.121	0.03	0	Endothelial cells
MAPK12	0	0.250602	0.106	0.01	0	Endothelial cells
GNG12	5.66491e-308	0.387834	0.256	0.104	1.68435e-303	Endothelial cells
PRKAR1B	1.69403e-307	0.269238	0.178	0.057	5.03687e-303	Endothelial cells
LIMS1	2.12934e-306	0.452259	0.46	0.246	6.33116e-302	Endothelial cells
JMJD1C	2.52654e-305	0.525449	0.553	0.327	7.51217e-301	Endothelial cells
CDKN1C	2.96934e-304	0.304708	0.189	0.063	8.82874e-300	Endothelial cells
ASL	9.38924e-304	0.383443	0.248	0.099	2.7917e-299	Endothelial cells
BCAP31	1.00093e-302	0.512612	0.628	0.403	2.97605e-298	Endothelial cells
STRN4	4.32086e-301	0.293953	0.152	0.045	1.28472e-296	Endothelial cells
RPS6KA3	4.49234e-301	0.262079	0.219	0.078	1.33571e-296	Endothelial cells
SIGIRR	6.06496e-301	0.390387	0.46	0.242	1.8033e-296	Endothelial cells
MAP1LC3B	7.10697e-301	0.525119	0.641	0.422	2.11312e-296	Endothelial cells
TNFRSF4	5.69861e-299	0.408646	0.229	0.084	1.69437e-294	Endothelial cells
ERICH1	1.88344e-298	0.337493	0.312	0.138	5.60003e-294	Endothelial cells
PSMB5	5.75694e-297	0.491753	0.526	0.307	1.71171e-292	Endothelial cells
CCNY	5.81887e-297	0.3099	0.193	0.067	1.73012e-292	Endothelial cells
URM1	3.85923e-296	0.37183	0.344	0.163	1.14746e-291	Endothelial cells
ZMIZ1	1.4514e-295	0.356259	0.225	0.086	4.31545e-291	Endothelial cells
MRPL33	2.19165e-295	0.630431	0.525	0.316	6.51644e-291	Endothelial cells
TBC1D15	6.67374e-294	0.294788	0.232	0.089	1.9843e-289	Endothelial cells
EGR1	7.14335e-294	0.353952	0.608	0.368	2.12393e-289	Endothelial cells
CTTN	1.8489e-293	0.439471	0.293	0.13	5.49732e-289	Endothelial cells
MT-ND1	4.7305e-293	0.468717	0.954	0.927	1.40652e-288	Endothelial cells
GNB4	2.59457e-292	0.349847	0.262	0.108	7.71444e-288	Endothelial cells
CPD	8.00505e-292	0.331802	0.243	0.096	2.38014e-287	Endothelial cells
SOS1	2.54792e-291	0.414205	0.174	0.058	7.57572e-287	Endothelial cells
MRPL17	1.0908e-290	0.605032	0.343	0.171	3.24329e-286	Endothelial cells
PLCG1	1.60419e-290	0.256416	0.152	0.045	4.76973e-286	Endothelial cells
KLF10	6.63713e-290	0.567222	0.384	0.196	1.97342e-285	Endothelial cells
RBKS	8.3276e-288	0.546741	0.275	0.117	2.47605e-283	Endothelial cells
CCL2	5.44269e-286	0.320346	0.281	0.119	1.61828e-281	Endothelial cells
FRMD4A	1.19063e-284	0.34303	0.194	0.07	3.54011e-280	Endothelial cells
LGALS9	7.40381e-283	0.420607	0.273	0.116	2.20138e-278	Endothelial cells
MAFF	3.5815e-282	0.356526	0.444	0.23	1.06489e-277	Endothelial cells
CRTAP	3.92968e-282	0.378093	0.499	0.279	1.16841e-277	Endothelial cells
BDH2	3.84722e-281	0.334537	0.244	0.098	1.14389e-276	Endothelial cells
GPX3	6.87402e-281	0.309628	0.223	0.084	2.04385e-276	Endothelial cells
TAF1C	3.71409e-280	0.259982	0.106	0.025	1.10431e-275	Endothelial cells
SEC62	6.57552e-280	0.566875	0.656	0.435	1.9551e-275	Endothelial cells
EML3	9.86827e-280	0.298456	0.179	0.061	2.93413e-275	Endothelial cells
ARL2BP	1.45605e-279	0.389811	0.403	0.21	4.32928e-275	Endothelial cells
AGAP2-AS1	1.97738e-279	0.256962	0.141	0.042	5.87935e-275	Endothelial cells
KLHL5	5.21734e-279	0.295186	0.151	0.047	1.55127e-274	Endothelial cells
PEAK1	5.84676e-279	0.301064	0.165	0.053	1.73842e-274	Endothelial cells
TM6SF1	3.07958e-278	0.260245	0.119	0.031	9.15653e-274	Endothelial cells
GNB1	2.54106e-277	0.424958	0.374	0.191	7.55532e-273	Endothelial cells
RALGDS	1.27452e-276	0.317734	0.256	0.106	3.78954e-272	Endothelial cells
PPFIA3	1.63695e-276	0.268438	0.116	0.031	4.86714e-272	Endothelial cells
CRBN	1.25439e-275	0.375794	0.331	0.156	3.72968e-271	Endothelial cells
MBNL2	1.94109e-275	0.401119	0.294	0.132	5.77144e-271	Endothelial cells
PLAT	4.09413e-275	0.506893	0.207	0.077	1.21731e-270	Endothelial cells
LY96	1.31681e-274	0.322046	0.301	0.132	3.91526e-270	Endothelial cells
NFIC	1.58658e-274	0.4063	0.48	0.268	4.71739e-270	Endothelial cells
SHISA5	4.0542e-274	0.419363	0.54	0.32	1.20543e-269	Endothelial cells
KCTD10	1.03958e-273	0.262767	0.149	0.046	3.09099e-269	Endothelial cells
HSPA2	3.38542e-273	0.361404	0.226	0.089	1.00659e-268	Endothelial cells
LRG1	9.70923e-273	0.314903	0.116	0.03	2.88684e-268	Endothelial cells
CYB5D2	1.53969e-272	0.275289	0.173	0.059	4.57797e-268	Endothelial cells
SEC11A	1.61259e-272	0.460462	0.677	0.47	4.79473e-268	Endothelial cells
NASP	2.00238e-272	0.363459	0.488	0.271	5.95368e-268	Endothelial cells
GNA11	7.23732e-272	0.273132	0.156	0.05	2.15187e-267	Endothelial cells
PDE8A	1.9952e-271	0.294464	0.141	0.042	5.93233e-267	Endothelial cells
NEIL1	3.04502e-271	0.273262	0.149	0.047	9.05375e-267	Endothelial cells
HEBP1	3.44962e-271	0.432743	0.367	0.19	1.02568e-266	Endothelial cells
CDK17	1.08375e-270	0.266684	0.265	0.11	3.22231e-266	Endothelial cells
OS9	1.14879e-270	0.413691	0.441	0.244	3.41568e-266	Endothelial cells
PTK2	2.46227e-269	0.330568	0.282	0.125	7.32107e-265	Endothelial cells
CTSC	2.88927e-269	0.340386	0.532	0.297	8.59068e-265	Endothelial cells
PDLIM7	9.48917e-269	0.36396	0.306	0.139	2.82141e-264	Endothelial cells
SMAD5	8.7443e-268	0.352527	0.235	0.097	2.59994e-263	Endothelial cells
FGFR1	1.42147e-267	0.264291	0.193	0.069	4.22644e-263	Endothelial cells
SYPL1	8.07786e-267	0.421923	0.549	0.324	2.40179e-262	Endothelial cells
KIAA0141	2.45107e-266	0.319568	0.223	0.089	7.28777e-262	Endothelial cells
KLF8	3.42448e-266	0.253753	0.109	0.028	1.0182e-261	Endothelial cells
ARRDC3	5.60064e-266	0.40242	0.269	0.117	1.66524e-261	Endothelial cells
ELF2	5.70702e-266	0.380152	0.319	0.153	1.69687e-261	Endothelial cells
REV3L	2.46842e-265	0.325032	0.265	0.114	7.33935e-261	Endothelial cells
ARHGEF10	5.34189e-265	0.258633	0.109	0.028	1.58831e-260	Endothelial cells
DENND5A	7.55363e-265	0.255304	0.139	0.042	2.24592e-260	Endothelial cells
CYTH1	1.83541e-263	0.283833	0.303	0.137	5.45721e-259	Endothelial cells
PIM3	2.50341e-263	0.539175	0.512	0.313	7.4434e-259	Endothelial cells
MESDC1	3.22043e-261	0.335461	0.2	0.076	9.57532e-257	Endothelial cells
DDX5	1.18588e-260	0.356779	0.883	0.745	3.52598e-256	Endothelial cells
IFI6	6.02254e-259	0.347062	0.572	0.339	1.79068e-254	Endothelial cells
EPS8	1.73069e-257	0.269961	0.251	0.105	5.14586e-253	Endothelial cells
DAD1	3.36615e-257	0.518648	0.729	0.523	1.00086e-252	Endothelial cells
TSPAN14	9.64072e-255	0.329358	0.335	0.162	2.86648e-250	Endothelial cells
TMEM245	9.54091e-254	0.262219	0.208	0.081	2.8368e-249	Endothelial cells
TMEM30A	1.11391e-253	0.434949	0.326	0.162	3.31198e-249	Endothelial cells
WNK1	2.94987e-252	0.378013	0.392	0.208	8.77084e-248	Endothelial cells
ATP5J	3.28021e-252	0.585831	0.734	0.533	9.75303e-248	Endothelial cells
SRGAP2	5.05383e-252	0.276701	0.142	0.045	1.50266e-247	Endothelial cells
CASC15	1.50787e-251	0.339997	0.109	0.029	4.48336e-247	Endothelial cells
POMP	5.22984e-251	0.556639	0.74	0.542	1.55499e-246	Endothelial cells
PHACTR4	2.72352e-249	0.338818	0.235	0.099	8.09785e-245	Endothelial cells
REXO2	6.05185e-249	0.400876	0.45	0.255	1.7994e-244	Endothelial cells
SERBP1	1.03882e-248	0.431232	0.697	0.505	3.08872e-244	Endothelial cells
STX12	1.13554e-248	0.377343	0.315	0.154	3.37631e-244	Endothelial cells
GNAS	2.84492e-248	0.58392	0.69	0.49	8.45882e-244	Endothelial cells
ANXA4	1.50532e-247	0.444595	0.361	0.193	4.47577e-243	Endothelial cells
NQO1	2.88686e-247	0.305625	0.273	0.124	8.58349e-243	Endothelial cells
ARL13B	8.92741e-247	0.258529	0.205	0.08	2.65439e-242	Endothelial cells
ZBTB20	1.99555e-246	0.26597	0.317	0.147	5.93338e-242	Endothelial cells
CHD9	2.04696e-245	0.430032	0.419	0.233	6.08621e-241	Endothelial cells
ZFP36	1.69541e-244	0.482315	0.893	0.788	5.04096e-240	Endothelial cells
CDKN3	1.0031e-243	0.332662	0.132	0.04	2.98253e-239	Endothelial cells
HLA-F	3.84405e-243	0.320214	0.495	0.276	1.14295e-238	Endothelial cells
NFKBIZ	1.12372e-242	0.553913	0.558	0.358	3.34116e-238	Endothelial cells
CTDSP2	1.47222e-242	0.295023	0.235	0.101	4.37736e-238	Endothelial cells
PSMB8	2.27837e-242	0.343038	0.622	0.395	6.77427e-238	Endothelial cells
SNAP23	2.08225e-241	0.356669	0.367	0.192	6.19115e-237	Endothelial cells
HSP90B1	6.03682e-241	0.434855	0.756	0.555	1.79493e-236	Endothelial cells
SERINC1	1.12707e-240	0.350776	0.464	0.265	3.3511e-236	Endothelial cells
CHD7	1.33373e-240	0.274625	0.18	0.067	3.96557e-236	Endothelial cells
AKAP12	1.6483e-240	0.562636	0.152	0.051	4.90088e-236	Endothelial cells
RABAC1	3.33159e-240	0.434557	0.727	0.508	9.90582e-236	Endothelial cells
DDX3X	8.24328e-240	0.348984	0.642	0.422	2.45097e-235	Endothelial cells
ASPH	9.37739e-240	0.371672	0.387	0.208	2.78818e-235	Endothelial cells
ZSCAN18	9.78261e-240	0.264014	0.192	0.073	2.90866e-235	Endothelial cells
OSBPL1A	3.38961e-239	0.421191	0.277	0.133	1.00783e-234	Endothelial cells
C1orf123	3.59561e-239	0.330288	0.311	0.153	1.06908e-234	Endothelial cells
RNH1	5.10387e-238	0.445776	0.557	0.359	1.51753e-233	Endothelial cells
PITPNB	7.5653e-238	0.315771	0.291	0.138	2.24939e-233	Endothelial cells
RCBTB2	1.61779e-237	0.254295	0.145	0.047	4.81017e-233	Endothelial cells
NFKBIA	1.26151e-236	0.469915	0.822	0.683	3.75085e-232	Endothelial cells
BSG	1.27043e-236	0.457122	0.678	0.474	3.77738e-232	Endothelial cells
STAT3	1.56465e-236	0.414569	0.676	0.467	4.65218e-232	Endothelial cells
TUBA1B	6.42545e-236	0.327935	0.801	0.624	1.91048e-231	Endothelial cells
TAP2	1.9958e-235	0.288501	0.156	0.054	5.93413e-231	Endothelial cells
MCFD2	7.51824e-235	0.379594	0.318	0.162	2.2354e-230	Endothelial cells
SLC41A3	1.44837e-233	0.288157	0.221	0.093	4.30644e-229	Endothelial cells
SH3GLB1	9.11621e-233	0.385008	0.476	0.285	2.71052e-228	Endothelial cells
ENY2	1.52418e-231	0.465581	0.637	0.438	4.53185e-227	Endothelial cells
STK25	2.57059e-231	0.319862	0.301	0.147	7.64312e-227	Endothelial cells
NARF	3.26264e-231	0.443159	0.374	0.201	9.70081e-227	Endothelial cells
SRSF4	4.25665e-231	0.352996	0.453	0.262	1.26563e-226	Endothelial cells
EBPL	4.46792e-231	0.361729	0.34	0.177	1.32845e-226	Endothelial cells
ERC1	9.265e-231	0.275926	0.19	0.074	2.75476e-226	Endothelial cells
SIPA1L2	2.17935e-229	0.309657	0.119	0.036	6.47987e-225	Endothelial cells
C5orf24	7.41847e-229	0.341949	0.279	0.133	2.20573e-224	Endothelial cells
RTN4	1.05603e-227	0.403136	0.667	0.454	3.13989e-223	Endothelial cells
CCPG1	4.24863e-227	0.364001	0.35	0.184	1.26325e-222	Endothelial cells
WDR60	3.98574e-226	0.318626	0.211	0.089	1.18508e-221	Endothelial cells
SELM	5.48343e-226	0.283692	0.651	0.397	1.63039e-221	Endothelial cells
FGD6	6.10208e-226	0.250306	0.112	0.033	1.81433e-221	Endothelial cells
IFIT1	9.62078e-226	0.338844	0.193	0.076	2.86055e-221	Endothelial cells
PLOD1	2.06215e-225	0.340755	0.217	0.093	6.1314e-221	Endothelial cells
MPRIP	2.57688e-225	0.264409	0.224	0.094	7.66184e-221	Endothelial cells
PARVA	1.16595e-223	0.306629	0.219	0.093	3.46672e-219	Endothelial cells
AFF1	1.47846e-222	0.308762	0.206	0.085	4.39592e-218	Endothelial cells
TRIM56	1.84449e-222	0.310073	0.263	0.123	5.48421e-218	Endothelial cells
ANKRD10	2.88188e-222	0.368606	0.41	0.229	8.5687e-218	Endothelial cells
MYLIP	1.23883e-221	0.311741	0.371	0.195	3.6834e-217	Endothelial cells
HACD3	3.39676e-221	0.352083	0.378	0.205	1.00996e-216	Endothelial cells
TAX1BP3	6.82442e-221	0.362945	0.224	0.099	2.02911e-216	Endothelial cells
ARPC1B	4.9469e-219	0.371367	0.623	0.402	1.47086e-214	Endothelial cells
CDC25B	2.74905e-218	0.272578	0.19	0.076	8.17374e-214	Endothelial cells
TCEAL4	8.28407e-218	0.327136	0.451	0.262	2.4631e-213	Endothelial cells
SLC38A2	8.53635e-218	0.470139	0.518	0.322	2.53811e-213	Endothelial cells
UBC	8.82622e-218	0.3097	0.922	0.875	2.6243e-213	Endothelial cells
IVNS1ABP	2.12692e-217	0.519126	0.426	0.247	6.32397e-213	Endothelial cells
RP11-670E13.6	5.01197e-217	0.263909	0.111	0.033	1.49021e-212	Endothelial cells
RAB5A	7.99741e-217	0.387989	0.384	0.214	2.37787e-212	Endothelial cells
EPN1	1.40602e-216	0.382202	0.389	0.219	4.18053e-212	Endothelial cells
MGMT	2.58375e-216	0.399595	0.394	0.224	7.68225e-212	Endothelial cells
MVP	1.53538e-215	0.337864	0.339	0.179	4.56514e-211	Endothelial cells
RIN2	1.62833e-215	0.374034	0.164	0.062	4.84152e-211	Endothelial cells
PTMA	1.21997e-214	0.256572	0.994	0.973	3.62734e-210	Endothelial cells
ATL3	3.25999e-214	0.303617	0.251	0.117	9.69292e-210	Endothelial cells
RSRP1	1.79263e-212	0.399245	0.685	0.489	5.33002e-208	Endothelial cells
PSIP1	3.68828e-212	0.26845	0.401	0.217	1.09664e-207	Endothelial cells
TMEM70	2.83082e-211	0.433873	0.33	0.177	8.41688e-207	Endothelial cells
MT-ND5	4.62319e-210	0.431771	0.905	0.812	1.37461e-205	Endothelial cells
KIF1C	9.47425e-210	0.260067	0.151	0.055	2.81698e-205	Endothelial cells
ADAM10	1.44043e-209	0.348552	0.302	0.154	4.28282e-205	Endothelial cells
TNKS1BP1	2.41488e-209	0.300089	0.166	0.064	7.18015e-205	Endothelial cells
SMTN	4.36234e-209	0.25538	0.155	0.057	1.29706e-204	Endothelial cells
SH3GL1	1.91167e-208	0.305224	0.201	0.086	5.68397e-204	Endothelial cells
EXT2	4.13313e-208	0.251153	0.16	0.06	1.2289e-203	Endothelial cells
ARRDC2	4.33769e-208	0.273841	0.193	0.079	1.28973e-203	Endothelial cells
THEM6	6.18363e-208	0.330187	0.19	0.079	1.83858e-203	Endothelial cells
DNAJB4	5.79719e-207	0.37717	0.368	0.198	1.72368e-202	Endothelial cells
AAMDC	3.46106e-206	0.319494	0.282	0.141	1.02908e-201	Endothelial cells
PRDX4	3.51597e-206	0.296566	0.48	0.288	1.0454e-201	Endothelial cells
GSTO1	3.30441e-205	0.367751	0.454	0.271	9.825e-201	Endothelial cells
WSB1	5.97377e-205	0.406696	0.699	0.501	1.77618e-200	Endothelial cells
ABHD17A	6.39969e-205	0.276012	0.218	0.096	1.90282e-200	Endothelial cells
SKAP2	1.53609e-203	0.288267	0.274	0.134	4.56726e-199	Endothelial cells
ZNF22	1.07771e-202	0.323374	0.32	0.169	3.20436e-198	Endothelial cells
ZNHIT1	2.84336e-202	0.376141	0.574	0.38	8.45417e-198	Endothelial cells
KITLG	2.55813e-201	0.252696	0.125	0.042	7.60609e-197	Endothelial cells
VPS51	2.92511e-201	0.333608	0.352	0.193	8.69722e-197	Endothelial cells
AK3	1.70286e-200	0.318948	0.316	0.166	5.06311e-196	Endothelial cells
PLA2G16	1.73974e-200	0.251178	0.448	0.255	5.17277e-196	Endothelial cells
ATOX1	3.58296e-200	0.409895	0.547	0.352	1.06532e-195	Endothelial cells
BTBD7	3.83577e-200	0.263491	0.177	0.072	1.14049e-195	Endothelial cells
ERF	6.26862e-200	0.265497	0.19	0.079	1.86385e-195	Endothelial cells
CHMP3	7.27529e-200	0.344863	0.315	0.168	2.16316e-195	Endothelial cells
IFI44	2.86606e-198	0.284842	0.255	0.119	8.52165e-194	Endothelial cells
HSD3B7	4.78674e-198	0.27666	0.165	0.066	1.42324e-193	Endothelial cells
GOLIM4	5.35082e-198	0.291405	0.23	0.106	1.59096e-193	Endothelial cells
NUDT3	2.67684e-197	0.334816	0.285	0.146	7.95906e-193	Endothelial cells
GMDS	1.09248e-196	0.308758	0.273	0.135	3.24828e-192	Endothelial cells
CD99	2.8535e-196	0.341196	0.77	0.572	8.4843e-192	Endothelial cells
TP53I3	3.38439e-196	0.296899	0.17	0.069	1.00628e-191	Endothelial cells
FAM127A	2.23656e-195	0.355342	0.367	0.206	6.64996e-191	Endothelial cells
PDCL	2.43961e-195	0.256441	0.19	0.08	7.25368e-191	Endothelial cells
PRPSAP1	2.57953e-194	0.280571	0.268	0.133	7.66971e-190	Endothelial cells
EFCAB14	2.63823e-194	0.388139	0.293	0.152	7.84424e-190	Endothelial cells
IFT43	7.9529e-194	0.371549	0.274	0.14	2.36464e-189	Endothelial cells
PPP2R2A	2.69809e-193	0.314109	0.34	0.184	8.02223e-189	Endothelial cells
GNG5	3.85564e-193	0.386754	0.774	0.576	1.1464e-188	Endothelial cells
RNF145	9.50115e-193	0.276554	0.267	0.13	2.82498e-188	Endothelial cells
RRAGA	1.25454e-192	0.309006	0.342	0.189	3.73013e-188	Endothelial cells
EIF4G3	6.12457e-192	0.27485	0.191	0.082	1.82102e-187	Endothelial cells
AHNAK	1.44147e-191	0.355521	0.607	0.411	4.28591e-187	Endothelial cells
RRBP1	2.78488e-191	0.361171	0.425	0.254	8.2803e-187	Endothelial cells
ANKRD17	3.25608e-191	0.266462	0.248	0.12	9.6813e-187	Endothelial cells
SH3BP2	6.15415e-191	0.286229	0.184	0.077	1.82981e-186	Endothelial cells
PPP1R10	1.10756e-190	0.38339	0.433	0.264	3.29312e-186	Endothelial cells
SYNJ2	7.48872e-190	0.259226	0.152	0.058	2.22662e-185	Endothelial cells
UBE2G2	1.02984e-189	0.303021	0.283	0.145	3.06204e-185	Endothelial cells
SQSTM1	1.83509e-189	0.472703	0.734	0.583	5.45629e-185	Endothelial cells
DPP8	1.48036e-188	0.260565	0.199	0.087	4.40157e-184	Endothelial cells
MED13L	1.32117e-187	0.282933	0.226	0.106	3.92824e-183	Endothelial cells
NCK1	6.93103e-187	0.287158	0.288	0.149	2.0608e-182	Endothelial cells
PARP14	1.64005e-185	0.318762	0.331	0.178	4.87635e-181	Endothelial cells
ATRX	6.53751e-185	0.368733	0.539	0.359	1.9438e-180	Endothelial cells
MAP1LC3A	7.26398e-185	0.30982	0.344	0.189	2.1598e-180	Endothelial cells
OAZ2	1.35738e-184	0.341511	0.309	0.167	4.03591e-180	Endothelial cells
INTS6	8.17248e-184	0.354947	0.342	0.19	2.42992e-179	Endothelial cells
MT1M	3.41983e-183	0.267172	0.161	0.064	1.01682e-178	Endothelial cells
RERE	4.83238e-183	0.305316	0.271	0.139	1.43681e-178	Endothelial cells
NFAT5	7.10989e-183	0.273394	0.28	0.142	2.11398e-178	Endothelial cells
TIMMDC1	1.11294e-182	0.372554	0.348	0.2	3.30909e-178	Endothelial cells
MYO1B	4.06306e-182	0.378935	0.19	0.084	1.20807e-177	Endothelial cells
CTDSP1	7.54655e-182	0.266064	0.246	0.12	2.24382e-177	Endothelial cells
WDR13	4.31864e-181	0.302924	0.262	0.133	1.28406e-176	Endothelial cells
CDIPT	5.086e-181	0.289212	0.353	0.2	1.51222e-176	Endothelial cells
HEXIM1	1.08071e-180	0.360444	0.311	0.167	3.21329e-176	Endothelial cells
USP22	3.98147e-180	0.309372	0.291	0.153	1.18381e-175	Endothelial cells
RHOA	4.89592e-180	0.337103	0.843	0.721	1.4557e-175	Endothelial cells
MAP1B	5.87975e-180	0.252612	0.218	0.098	1.74823e-175	Endothelial cells
ANKRD28	7.44202e-180	0.273168	0.318	0.167	2.21274e-175	Endothelial cells
NSRP1	2.59872e-179	0.317924	0.264	0.134	7.72677e-175	Endothelial cells
CANX	1.28221e-177	0.361464	0.582	0.392	3.81241e-173	Endothelial cells
OCIAD1	3.26195e-177	0.343768	0.537	0.359	9.69876e-173	Endothelial cells
CFDP1	3.77365e-177	0.339406	0.338	0.191	1.12202e-172	Endothelial cells
BHLHE40	5.57439e-177	0.411811	0.473	0.297	1.65743e-172	Endothelial cells
TMEM179B	7.3744e-177	0.394993	0.508	0.334	2.19263e-172	Endothelial cells
IRF1	8.13636e-177	0.468515	0.611	0.444	2.41918e-172	Endothelial cells
MGAT1	8.37419e-176	0.291052	0.4	0.235	2.4899e-171	Endothelial cells
DHRS3	9.20881e-176	0.299379	0.178	0.077	2.73806e-171	Endothelial cells
JUNB	1.35497e-175	0.293384	0.915	0.828	4.02872e-171	Endothelial cells
MX1	3.72111e-175	0.28883	0.35	0.194	1.1064e-170	Endothelial cells
LINC01420	7.54837e-175	0.322299	0.473	0.3	2.24436e-170	Endothelial cells
SREK1	7.71483e-175	0.33048	0.34	0.193	2.29385e-170	Endothelial cells
SAMM50	2.37049e-174	0.26603	0.242	0.121	7.04819e-170	Endothelial cells
TMBIM1	1.66817e-173	0.292127	0.349	0.198	4.95996e-169	Endothelial cells
TCEA2	4.92863e-173	0.280668	0.177	0.077	1.46543e-168	Endothelial cells
CDC27	8.84238e-173	0.250693	0.237	0.117	2.6291e-168	Endothelial cells
AP2M1	2.5933e-172	0.336622	0.602	0.41	7.71065e-168	Endothelial cells
RAB5C	7.24619e-172	0.38429	0.37	0.219	2.15451e-167	Endothelial cells
DCTN2	1.02542e-171	0.303496	0.401	0.243	3.04888e-167	Endothelial cells
TSPAN15	1.17616e-171	0.348675	0.227	0.111	3.49707e-167	Endothelial cells
KIF9	4.23614e-171	0.265626	0.207	0.097	1.25953e-166	Endothelial cells
TXNDC12	2.83521e-170	0.33036	0.385	0.231	8.42993e-166	Endothelial cells
PKN2	2.85554e-170	0.290012	0.304	0.166	8.49039e-166	Endothelial cells
SOX4	4.60068e-170	0.338453	0.41	0.244	1.36792e-165	Endothelial cells
FAR1	9.9319e-169	0.291	0.193	0.088	2.95305e-164	Endothelial cells
HNRNPH1	1.11562e-168	0.446467	0.496	0.324	3.31708e-164	Endothelial cells
FNDC3B	1.54139e-168	0.300168	0.293	0.159	4.58302e-164	Endothelial cells
C1orf21	1.5874e-168	0.262731	0.27	0.14	4.71983e-164	Endothelial cells
HOTAIRM1	1.15915e-166	0.251624	0.17	0.073	3.4465e-162	Endothelial cells
EI24	4.30859e-166	0.326446	0.356	0.21	1.28107e-161	Endothelial cells
CHMP5	3.69204e-165	0.33374	0.496	0.322	1.09775e-160	Endothelial cells
EIF2AK4	3.95261e-165	0.274396	0.263	0.139	1.17523e-160	Endothelial cells
BORCS7	1.14576e-164	0.2551	0.23	0.114	3.40667e-160	Endothelial cells
INF2	1.33891e-163	0.307783	0.179	0.081	3.98097e-159	Endothelial cells
HDAC1	1.55483e-163	0.262456	0.321	0.178	4.62297e-159	Endothelial cells
CYFIP1	5.41832e-163	0.310318	0.225	0.113	1.61103e-158	Endothelial cells
NTAN1	8.4955e-163	0.289421	0.26	0.136	2.52597e-158	Endothelial cells
LDLR	5.2135e-162	0.296791	0.246	0.125	1.55013e-157	Endothelial cells
PYURF	7.05898e-159	0.351809	0.527	0.358	2.09885e-154	Endothelial cells
YIPF3	2.28858e-158	0.317471	0.432	0.275	6.80463e-154	Endothelial cells
ACAT1	2.4308e-158	0.273632	0.24	0.124	7.2275e-154	Endothelial cells
TPST2	2.65282e-158	0.267531	0.305	0.168	7.88764e-154	Endothelial cells
ATP1B3	3.07725e-158	0.269087	0.508	0.328	9.14958e-154	Endothelial cells
TPGS1	3.47815e-158	0.276612	0.272	0.146	1.03416e-153	Endothelial cells
TEX264	1.16687e-157	0.319629	0.373	0.225	3.46944e-153	Endothelial cells
GNAI3	3.51125e-157	0.297359	0.376	0.227	1.044e-152	Endothelial cells
DDX21	4.11953e-157	0.305249	0.471	0.308	1.22486e-152	Endothelial cells
EEA1	4.26576e-157	0.3018	0.274	0.149	1.26834e-152	Endothelial cells
BRI3	7.5297e-156	0.323562	0.277	0.153	2.2388e-151	Endothelial cells
RFK	1.05388e-155	0.25408	0.211	0.104	3.1335e-151	Endothelial cells
CFAP36	6.78215e-155	0.336584	0.285	0.159	2.01654e-150	Endothelial cells
ITGB1BP1	7.55569e-155	0.274777	0.387	0.233	2.24653e-150	Endothelial cells
XRN2	1.11865e-154	0.299816	0.456	0.295	3.32609e-150	Endothelial cells
SDF4	6.88452e-154	0.311379	0.507	0.34	2.04698e-149	Endothelial cells
RBM42	1.49493e-153	0.287172	0.342	0.201	4.44487e-149	Endothelial cells
TCEB1	2.60709e-153	0.349526	0.58	0.409	7.75166e-149	Endothelial cells
TMEM259	2.65214e-153	0.301141	0.249	0.13	7.88561e-149	Endothelial cells
CTBP2	3.15391e-153	0.278255	0.226	0.116	9.37753e-149	Endothelial cells
FLYWCH2	3.16484e-152	0.288515	0.35	0.207	9.41001e-148	Endothelial cells
AIDA	3.36159e-152	0.252607	0.235	0.121	9.995e-148	Endothelial cells
PEPD	2.32296e-151	0.290824	0.303	0.173	6.90685e-147	Endothelial cells
NDUFA12	1.3711e-150	0.408637	0.514	0.353	4.07668e-146	Endothelial cells
TMEM219	1.07258e-149	0.314963	0.619	0.437	3.18911e-145	Endothelial cells
NUDT16	1.19853e-149	0.258937	0.224	0.114	3.5636e-145	Endothelial cells
BCL3	3.47739e-149	0.326827	0.26	0.141	1.03393e-144	Endothelial cells
MT-ATP6	4.10355e-148	0.26753	0.984	0.968	1.22011e-143	Endothelial cells
CISD1	4.14406e-148	0.305473	0.292	0.166	1.23215e-143	Endothelial cells
CHMP2A	1.15986e-147	0.305102	0.507	0.342	3.44861e-143	Endothelial cells
SON	2.48311e-147	0.32345	0.662	0.494	7.38302e-143	Endothelial cells
MT-ND3	4.16235e-147	0.341482	0.945	0.931	1.23759e-142	Endothelial cells
SBDS	1.47105e-145	0.262095	0.541	0.367	4.37388e-141	Endothelial cells
ITGAV	8.42344e-143	0.312801	0.242	0.13	2.50454e-138	Endothelial cells
TM9SF3	2.23431e-142	0.27189	0.279	0.156	6.64326e-138	Endothelial cells
APPL1	2.25761e-142	0.283187	0.354	0.216	6.71256e-138	Endothelial cells
AFF4	3.16973e-142	0.301093	0.414	0.264	9.42456e-138	Endothelial cells
FAM127B	1.88037e-141	0.279067	0.315	0.183	5.59091e-137	Endothelial cells
NOP10	6.52124e-141	0.359464	0.598	0.422	1.93896e-136	Endothelial cells
LRP10	1.12127e-140	0.255051	0.426	0.272	3.33388e-136	Endothelial cells
YWHAB	1.3723e-140	0.280013	0.77	0.623	4.08026e-136	Endothelial cells
AGPAT1	9.08249e-140	0.254064	0.192	0.095	2.7005e-135	Endothelial cells
LAMP1	2.37178e-139	0.288851	0.513	0.345	7.05203e-135	Endothelial cells
ATF4	2.84183e-139	0.283186	0.546	0.376	8.44962e-135	Endothelial cells
CSNK1A1	1.78062e-137	0.339135	0.57	0.402	5.29432e-133	Endothelial cells
IFNAR1	2.62902e-137	0.282113	0.279	0.159	7.81686e-133	Endothelial cells
PCMTD1	3.98964e-137	0.340902	0.358	0.223	1.18624e-132	Endothelial cells
RALBP1	4.30415e-137	0.28331	0.29	0.169	1.27975e-132	Endothelial cells
KLC1	9.20027e-136	0.256761	0.199	0.1	2.73552e-131	Endothelial cells
MVB12A	1.2714e-135	0.27606	0.294	0.173	3.78025e-131	Endothelial cells
HADHB	1.97134e-134	0.255124	0.373	0.233	5.86138e-130	Endothelial cells
TRIP12	7.48854e-134	0.251567	0.233	0.125	2.22657e-129	Endothelial cells
ZNF280D	1.20084e-133	0.26249	0.225	0.12	3.57045e-129	Endothelial cells
UBE2J1	4.86062e-133	0.342264	0.402	0.261	1.44521e-128	Endothelial cells
ACAP2	1.09689e-132	0.266673	0.409	0.263	3.26137e-128	Endothelial cells
CXCL2	2.02844e-132	0.299081	0.226	0.117	6.03117e-128	Endothelial cells
ZFAND5	3.40224e-132	0.271876	0.585	0.42	1.01159e-127	Endothelial cells
SCP2	5.36179e-132	0.321231	0.543	0.378	1.59422e-127	Endothelial cells
TMEM205	5.48166e-132	0.284897	0.391	0.246	1.62986e-127	Endothelial cells
TCEAL8	6.57965e-132	0.281784	0.279	0.16	1.95633e-127	Endothelial cells
EIF4A1	1.07793e-131	0.254257	0.434	0.283	3.20501e-127	Endothelial cells
HNRNPD	4.09676e-130	0.270373	0.347	0.215	1.21809e-125	Endothelial cells
CCNL1	3.53361e-129	0.306744	0.659	0.498	1.05065e-124	Endothelial cells
SLC25A37	6.33431e-129	0.253961	0.269	0.152	1.88338e-124	Endothelial cells
DYNC1I2	1.52418e-128	0.294911	0.298	0.177	4.53186e-124	Endothelial cells
GNB2	3.45338e-127	0.299445	0.602	0.432	1.02679e-122	Endothelial cells
UPF3A	4.21102e-126	0.290365	0.31	0.188	1.25206e-121	Endothelial cells
SMARCE1	8.3831e-125	0.261692	0.334	0.205	2.49255e-120	Endothelial cells
RBBP6	1.29597e-122	0.273267	0.41	0.27	3.85331e-118	Endothelial cells
MKKS	1.50251e-122	0.259485	0.307	0.187	4.46741e-118	Endothelial cells
DUT	7.27185e-122	0.253563	0.546	0.382	2.16214e-117	Endothelial cells
EIF2S2	1.30052e-120	0.308038	0.451	0.308	3.86683e-116	Endothelial cells
LUC7L3	3.59238e-120	0.263321	0.49	0.338	1.06812e-115	Endothelial cells
DDRGK1	6.52327e-120	0.265547	0.379	0.244	1.93957e-115	Endothelial cells
HSBP1	3.0073e-119	0.298462	0.573	0.406	8.9416e-115	Endothelial cells
CNIH4	7.00305e-119	0.28679	0.375	0.24	2.08222e-114	Endothelial cells
SCARB2	1.99065e-118	0.25286	0.322	0.198	5.9188e-114	Endothelial cells
TSPO	3.03995e-118	0.276787	0.708	0.533	9.03868e-114	Endothelial cells
CCNL2	3.37581e-118	0.288628	0.242	0.137	1.00373e-113	Endothelial cells
LINC00116	4.63548e-118	0.311748	0.301	0.183	1.37827e-113	Endothelial cells
2002-09-01	2.78748e-117	0.291595	0.495	0.349	8.28803e-113	Endothelial cells
SFPQ	6.18493e-116	0.260729	0.562	0.404	1.83897e-111	Endothelial cells
VPS28	7.98029e-116	0.251144	0.598	0.436	2.37278e-111	Endothelial cells
EIF4G1	1.72735e-115	0.254642	0.327	0.205	5.13593e-111	Endothelial cells
GNG10	2.59036e-115	0.277964	0.259	0.15	7.70192e-111	Endothelial cells
ZDHHC3	1.26737e-114	0.250432	0.236	0.134	3.76826e-110	Endothelial cells
LTBP4	1.47895e-113	0.469357	0.188	0.1	4.39736e-109	Endothelial cells
MORF4L1	2.40376e-113	0.282688	0.709	0.555	7.1471e-109	Endothelial cells
IER2	2.63762e-113	0.268684	0.788	0.635	7.84244e-109	Endothelial cells
CALM1	5.92155e-113	0.292345	0.861	0.774	1.76066e-108	Endothelial cells
OCIAD2	1.96155e-112	0.369113	0.443	0.296	5.83227e-108	Endothelial cells
SLC3A2	2.70825e-112	0.262943	0.478	0.332	8.05244e-108	Endothelial cells
DDAH2	1.20521e-111	0.286761	0.409	0.275	3.58346e-107	Endothelial cells
NAA10	1.87641e-111	0.312452	0.231	0.133	5.57912e-107	Endothelial cells
LAMTOR5	5.96656e-110	0.292709	0.544	0.394	1.77404e-105	Endothelial cells
PGF	1.00418e-109	0.269094	0.121	0.053	2.98574e-105	Endothelial cells
SAT1	3.59138e-109	0.427028	0.822	0.692	1.06783e-104	Endothelial cells
PDIA6	5.38368e-107	0.274166	0.61	0.451	1.60073e-102	Endothelial cells
DDIT4	7.93075e-106	0.468746	0.596	0.45	2.35805e-101	Endothelial cells
HNRNPM	1.56252e-105	0.27079	0.474	0.332	4.64584e-101	Endothelial cells
PPIB	4.78984e-104	0.253938	0.811	0.663	1.42416e-99	Endothelial cells
PDIA3	8.05454e-103	0.276996	0.667	0.509	2.39486e-98	Endothelial cells
SNHG7	2.30786e-101	0.344573	0.333	0.221	6.86196e-97	Endothelial cells
TMEM14C	6.13044e-100	0.251459	0.538	0.389	1.82276e-95	Endothelial cells
DDX17	4.93906e-98	0.293477	0.579	0.432	1.46853e-93	Endothelial cells
TMEM59	5.29908e-97	0.267882	0.72	0.572	1.57558e-92	Endothelial cells
TMEM165	7.08359e-94	0.250411	0.46	0.327	2.10617e-89	Endothelial cells
PGRMC2	9.59981e-94	0.266141	0.167	0.09	2.85431e-89	Endothelial cells
CAMTA1	2.63711e-93	0.30674	0.423	0.296	7.84092e-89	Endothelial cells
WDR83OS	4.73933e-93	0.278714	0.688	0.531	1.40915e-88	Endothelial cells
EIF4G2	1.23301e-92	0.250412	0.655	0.513	3.66611e-88	Endothelial cells
RHEB	4.53055e-91	0.261997	0.525	0.385	1.34707e-86	Endothelial cells
COMT	1.55417e-89	0.255375	0.448	0.315	4.62101e-85	Endothelial cells
MT-ND4L	3.09431e-86	0.422802	0.816	0.802	9.2003e-82	Endothelial cells
MLEC	3.89094e-86	0.436057	0.353	0.255	1.15689e-81	Endothelial cells
NDUFC1	1.37035e-85	0.2691	0.477	0.343	4.07448e-81	Endothelial cells
MTRNR2L12	2.75265e-85	0.473749	0.768	0.674	8.18446e-81	Endothelial cells
ANXA3	1.69425e-76	0.280624	0.107	0.053	5.03751e-72	Endothelial cells
TMBIM4	1.99828e-74	0.287259	0.249	0.161	5.94148e-70	Endothelial cells
JUP	8.62852e-70	0.309792	0.209	0.133	2.56552e-65	Endothelial cells
CA2	7.71895e-64	0.302512	0.126	0.07	2.29508e-59	Endothelial cells
FBLN5	9.74451e-58	0.459417	0.125	0.073	2.89733e-53	Endothelial cells
NDUFC2	3.06127e-51	0.29986	0.248	0.174	9.10207e-47	Endothelial cells
TP53I11	2.50535e-44	0.311642	0.161	0.108	7.44916e-40	Endothelial cells
PPA1	3.33291e-36	0.252844	0.488	0.398	9.90976e-32	Endothelial cells
MTRNR2L8	3.06232e-32	0.293248	0.215	0.159	9.10519e-28	Endothelial cells
DCN	0	5.79569	0.958	0.05	0	CAFs
COL1A1	0	5.65203	0.907	0.087	0	CAFs
LUM	0	5.45412	0.937	0.035	0	CAFs
APOD	0	5.28865	0.768	0.134	0	CAFs
COL1A2	0	5.26157	0.937	0.073	0	CAFs
SFRP2	0	5.22633	0.828	0.021	0	CAFs
COL3A1	0	5.18818	0.884	0.058	0	CAFs
POSTN	0	4.01255	0.623	0.037	0	CAFs
CTHRC1	0	3.92232	0.634	0.046	0	CAFs
MMP11	0	3.71512	0.362	0.019	0	CAFs
COL6A3	0	3.60346	0.831	0.029	0	CAFs
CTGF1	0	3.59584	0.678	0.088	0	CAFs
CTSK	0	3.55987	0.875	0.027	0	CAFs
C1S	0	3.53108	0.91	0.059	0	CAFs
FN1	0	3.50073	0.742	0.126	0	CAFs
CCDC80	0	3.48931	0.77	0.036	0	CAFs
COL6A2	0	3.45209	0.89	0.081	0	CAFs
CXCL14	0	3.44981	0.471	0.033	0	CAFs
SPARC1	0	3.42757	0.899	0.181	0	CAFs
RARRES2	0	3.41175	0.821	0.052	0	CAFs
COL6A1	0	3.37052	0.852	0.067	0	CAFs
PTGDS	0	3.36243	0.459	0.025	0	CAFs
BGN	0	3.24151	0.749	0.089	0	CAFs
SFRP4	0	3.19268	0.336	0.006	0	CAFs
CFD	0	3.18557	0.377	0.135	0	CAFs
AEBP1	0	3.17351	0.737	0.044	0	CAFs
MMP21	0	3.1108	0.762	0.037	0	CAFs
SERPINF1	0	3.09577	0.844	0.093	0	CAFs
FBLN1	0	3.08848	0.753	0.04	0	CAFs
TIMP1	0	3.00673	0.931	0.383	0	CAFs
CXCL121	0	2.90862	0.73	0.06	0	CAFs
MFAP4	0	2.90147	0.702	0.015	0	CAFs
VCAN1	0	2.88817	0.761	0.059	0	CAFs
CYR611	0	2.88719	0.661	0.164	0	CAFs
C3	0	2.82102	0.462	0.043	0	CAFs
ISLR	0	2.79634	0.75	0.037	0	CAFs
C1R	0	2.78958	0.751	0.058	0	CAFs
IGF21	0	2.73536	0.422	0.034	0	CAFs
GSN1	0	2.73529	0.854	0.305	0	CAFs
MXRA8	0	2.72855	0.725	0.042	0	CAFs
COL5A2	0	2.72707	0.685	0.031	0	CAFs
IGFBP41	0	2.71569	0.89	0.264	0	CAFs
IGF1	0	2.69655	0.529	0.027	0	CAFs
SERPING11	0	2.61098	0.889	0.193	0	CAFs
MEG3	0	2.56724	0.604	0.008	0	CAFs
PCOLCE	0	2.55692	0.781	0.058	0	CAFs
SPON2	0	2.45006	0.694	0.049	0	CAFs
THY1	0	2.44931	0.682	0.047	0	CAFs
CALD1	0	2.41132	0.931	0.197	0	CAFs
MFAP2	0	2.40087	0.552	0.029	0	CAFs
IGFBP6	0	2.37957	0.531	0.03	0	CAFs
TIMP31	0	2.35673	0.722	0.151	0	CAFs
LGALS1	0	2.3211	0.965	0.496	0	CAFs
DPT	0	2.28254	0.517	0.003	0	CAFs
ASPN	0	2.23537	0.417	0.013	0	CAFs
FSTL11	0	2.19453	0.693	0.061	0	CAFs
THBS2	0	2.18016	0.534	0.006	0	CAFs
COL14A1	0	2.17102	0.532	0.031	0	CAFs
LRP1	0	2.15864	0.717	0.065	0	CAFs
NNMT1	0	2.11764	0.737	0.147	0	CAFs
COL5A1	0	2.10974	0.53	0.015	0	CAFs
SRPX	0	2.08432	0.541	0.022	0	CAFs
HTRA11	0	2.07338	0.636	0.052	0	CAFs
COL12A1	0	2.05122	0.491	0.033	0	CAFs
TIMP2	0	2.0289	0.706	0.111	0	CAFs
FBLN21	0	1.9972	0.571	0.038	0	CAFs
PDGFRL	0	1.98571	0.542	0.01	0	CAFs
OLFML3	0	1.97519	0.628	0.028	0	CAFs
MDK	0	1.96934	0.785	0.223	0	CAFs
MXRA5	0	1.95652	0.544	0.012	0	CAFs
EFEMP1	0	1.90137	0.481	0.036	0	CAFs
LAPTM4A1	0	1.89765	0.898	0.475	0	CAFs
MMP14	0	1.89418	0.567	0.075	0	CAFs
PPIC1	0	1.87474	0.646	0.147	0	CAFs
EGR11	0	1.8527	0.759	0.358	0	CAFs
GEM	0	1.82821	0.602	0.132	0	CAFs
CD631	0	1.78509	0.951	0.559	0	CAFs
TMEM176B	0	1.77688	0.678	0.123	0	CAFs
TNFAIP6	0	1.77172	0.458	0.021	0	CAFs
FBN11	0	1.75857	0.544	0.033	0	CAFs
PMP221	0	1.75408	0.698	0.151	0	CAFs
PRRX1	0	1.7351	0.605	0.037	0	CAFs
CDH11	0	1.72126	0.531	0.014	0	CAFs
HTRA3	0	1.71443	0.371	0.004	0	CAFs
LGALS3BP	0	1.71315	0.74	0.213	0	CAFs
FBLN51	0	1.71143	0.531	0.042	0	CAFs
EFEMP2	0	1.70232	0.616	0.043	0	CAFs
FGF7	0	1.70004	0.441	0.014	0	CAFs
CLEC11A	0	1.69264	0.533	0.071	0	CAFs
IGFBP71	0	1.6926	0.868	0.233	0	CAFs
COMP	0	1.68421	0.203	0.003	0	CAFs
SERPINH11	0	1.68003	0.696	0.22	0	CAFs
PLPP31	0	1.67007	0.536	0.083	0	CAFs
PALLD	0	1.6656	0.578	0.125	0	CAFs
COL8A1	0	1.64625	0.338	0.009	0	CAFs
CILP	0	1.64281	0.304	0.002	0	CAFs
CYP1B11	0	1.63141	0.423	0.036	0	CAFs
PRSS231	0	1.61757	0.59	0.141	0	CAFs
PODN	0	1.60346	0.479	0.009	0	CAFs
FAP	0	1.59719	0.479	0.012	0	CAFs
ELN1	0	1.59445	0.386	0.032	0	CAFs
COL10A1	0	1.57645	0.311	0.002	0	CAFs
RCN3	0	1.57184	0.527	0.024	0	CAFs
MFAP5	0	1.56343	0.309	0.006	0	CAFs
CFH1	0	1.54455	0.467	0.049	0	CAFs
TMEM176A	0	1.53205	0.615	0.117	0	CAFs
CST31	0	1.51506	0.906	0.43	0	CAFs
ADAM12	0	1.50367	0.449	0.012	0	CAFs
F2R1	0	1.49178	0.477	0.052	0	CAFs
SSPN	0	1.4769	0.546	0.069	0	CAFs
LHFP1	0	1.47235	0.612	0.103	0	CAFs
SELM1	0	1.46885	0.829	0.385	0	CAFs
CRISPLD2	0	1.46847	0.514	0.05	0	CAFs
GPNMB	0	1.46428	0.535	0.077	0	CAFs
CERCAM	0	1.45854	0.47	0.048	0	CAFs
TCF41	0	1.45754	0.676	0.167	0	CAFs
ID31	0	1.44897	0.652	0.284	0	CAFs
SOD3	0	1.44598	0.473	0.073	0	CAFs
SERPINE11	0	1.44111	0.349	0.038	0	CAFs
GGT51	0	1.43104	0.473	0.056	0	CAFs
IFITM31	0	1.43048	0.973	0.521	0	CAFs
CD248	0	1.42947	0.444	0.023	0	CAFs
SULF1	0	1.42656	0.331	0.024	0	CAFs
SERPINE2	0	1.42203	0.423	0.047	0	CAFs
PLAC9	0	1.41952	0.514	0.072	0	CAFs
MGP	0	1.41712	0.831	0.395	0	CAFs
CPE	0	1.41545	0.537	0.071	0	CAFs
RASD1	0	1.41219	0.361	0.121	0	CAFs
ADH1B	0	1.3983	0.15	0.005	0	CAFs
CD991	0	1.39074	0.872	0.566	0	CAFs
ANTXR1	0	1.37476	0.413	0.031	0	CAFs
OGN	0	1.36898	0.314	0.003	0	CAFs
PI16	0	1.36577	0.117	0.004	0	CAFs
NBL1	0	1.36573	0.411	0.06	0	CAFs
GPC3	0	1.36469	0.264	0.01	0	CAFs
PDGFRB	0	1.35694	0.539	0.045	0	CAFs
PRELP	0	1.35394	0.353	0.017	0	CAFs
MAFB	0	1.35036	0.532	0.184	0	CAFs
MRC2	0	1.34265	0.452	0.018	0	CAFs
PDGFRA	0	1.33886	0.415	0.005	0	CAFs
LOXL1	0	1.32546	0.398	0.022	0	CAFs
FXYD1	0	1.32215	0.408	0.049	0	CAFs
NR2F1	0	1.31152	0.341	0.01	0	CAFs
NREP1	0	1.30756	0.339	0.054	0	CAFs
CALU	0	1.30416	0.585	0.223	0	CAFs
FKBP10	0	1.2998	0.519	0.073	0	CAFs
INHBA	0	1.29707	0.3	0.017	0	CAFs
COL11A1	0	1.29276	0.177	0.002	0	CAFs
WISP2	0	1.29093	0.201	0.005	0	CAFs
SEPP1	0	1.28396	0.686	0.244	0	CAFs
TMEM98	0	1.27463	0.496	0.059	0	CAFs
NGFRAP11	0	1.26749	0.67	0.226	0	CAFs
TAGLN	0	1.26735	0.619	0.133	0	CAFs
EMILIN1	0	1.25088	0.405	0.017	0	CAFs
LAMB11	0	1.24381	0.452	0.043	0	CAFs
CNN31	0	1.23592	0.672	0.228	0	CAFs
NID11	0	1.22735	0.452	0.035	0	CAFs
TPM2	0	1.2201	0.699	0.123	0	CAFs
PLTP	0	1.2105	0.527	0.094	0	CAFs
RND3	0	1.2076	0.415	0.069	0	CAFs
TMEM119	0	1.20502	0.374	0.007	0	CAFs
THBS1	0	1.19772	0.407	0.12	0	CAFs
LAMA2	0	1.19231	0.349	0.005	0	CAFs
WBP51	0	1.18842	0.527	0.127	0	CAFs
PTRF1	0	1.18816	0.659	0.156	0	CAFs
2011-09-01	0	1.17823	0.498	0.149	0	CAFs
SMOC2	0	1.17407	0.38	0.051	0	CAFs
GLT8D2	0	1.17277	0.435	0.019	0	CAFs
ITGBL1	0	1.16872	0.276	0.008	0	CAFs
COL16A1	0	1.16194	0.354	0.024	0	CAFs
ITM2A1	0	1.15731	0.484	0.239	0	CAFs
VIM1	0	1.15173	0.975	0.713	0	CAFs
KCNQ1OT1	0	1.15018	0.43	0.152	0	CAFs
PPIB1	0	1.14697	0.878	0.659	0	CAFs
PLXDC2	0	1.14476	0.457	0.104	0	CAFs
CPXM1	0	1.1398	0.328	0.007	0	CAFs
CYBRD1	0	1.1371	0.487	0.107	0	CAFs
FIGF	0	1.13508	0.198	0.001	0	CAFs
LGALS31	0	1.12435	0.845	0.473	0	CAFs
FRZB	0	1.1215	0.379	0.053	0	CAFs
MFGE8	0	1.11881	0.613	0.13	0	CAFs
IFI271	0	1.11842	0.824	0.286	0	CAFs
TSPAN41	0	1.11665	0.54	0.158	0	CAFs
ABCA6	0	1.1137	0.305	0.006	0	CAFs
PLXDC1	0	1.11231	0.377	0.034	0	CAFs
CHPF	0	1.11143	0.41	0.105	0	CAFs
RARRES1	0	1.10803	0.289	0.069	0	CAFs
CRTAP1	0	1.10582	0.617	0.272	0	CAFs
RUNX1T1	0	1.10531	0.34	0.022	0	CAFs
TNXB1	0	1.10457	0.244	0.026	0	CAFs
S100A61	0	1.10013	0.961	0.722	0	CAFs
MYL9	0	1.09506	0.759	0.162	0	CAFs
DPYSL31	0	1.09006	0.384	0.029	0	CAFs
LAMA41	0	1.08865	0.452	0.055	0	CAFs
IGFBP5	0	1.08686	0.41	0.141	0	CAFs
EID11	0	1.079	0.784	0.443	0	CAFs
COL15A11	0	1.07879	0.37	0.056	0	CAFs
FOS	0	1.07353	0.885	0.769	0	CAFs
ABCA8	0	1.07102	0.243	0.005	0	CAFs
ALDH1A1	0	1.07042	0.273	0.021	0	CAFs
TPM1	0	1.06913	0.598	0.291	0	CAFs
CCL21	0	1.06852	0.348	0.115	0	CAFs
SGCE	0	1.06686	0.391	0.043	0	CAFs
IGFBP31	0	1.06213	0.276	0.047	0	CAFs
ANXA5	0	1.04404	0.745	0.417	0	CAFs
TCF7L2	0	1.04345	0.395	0.081	0	CAFs
FGFR11	0	1.04318	0.419	0.053	0	CAFs
OSTC	0	1.04234	0.666	0.387	0	CAFs
LIMA11	0	1.02266	0.524	0.173	0	CAFs
PLAU	0	1.02151	0.308	0.069	0	CAFs
SVIL1	0	1.0186	0.44	0.093	0	CAFs
PLAGL1	0	1.01686	0.358	0.051	0	CAFs
AKAP121	0	1.00798	0.373	0.035	0	CAFs
ANGPTL21	0	1.0055	0.357	0.023	0	CAFs
SVEP1	0	1.005	0.254	0.002	0	CAFs
OLFML2B	0	1.0044	0.313	0.049	0	CAFs
CTSF	0	1.00276	0.423	0.126	0	CAFs
FMO1	0	1.00044	0.252	0.003	0	CAFs
ABI3BP	0	0.998881	0.284	0.004	0	CAFs
DIO2	0	0.997186	0.24	0.007	0	CAFs
LOX	0	0.994624	0.296	0.008	0	CAFs
THBS4	0	0.993473	0.135	0.003	0	CAFs
ECM1	0	0.992227	0.349	0.036	0	CAFs
TFPI1	0	0.986337	0.457	0.081	0	CAFs
ANXA21	0	0.98566	0.844	0.541	0	CAFs
NUPR1	0	0.983143	0.699	0.265	0	CAFs
S100A131	0	0.980466	0.691	0.25	0	CAFs
C71	0	0.9788	0.12	0.018	0	CAFs
NFIC1	0	0.978333	0.604	0.26	0	CAFs
ITGB11	0	0.976801	0.716	0.42	0	CAFs
SCPEP1	0	0.972674	0.508	0.184	0	CAFs
RGS161	0	0.972595	0.342	0.149	0	CAFs
UACA1	0	0.972177	0.448	0.101	0	CAFs
SLIT3	0	0.97094	0.299	0.032	0	CAFs
EMP11	0	0.965785	0.539	0.168	0	CAFs
PRKCDBP1	0	0.959289	0.525	0.12	0	CAFs
PDPN	0	0.956846	0.299	0.008	0	CAFs
RP11-14N7.2	0	0.955659	0.362	0.049	0	CAFs
RAB34	0	0.954748	0.488	0.127	0	CAFs
PDLIM71	0	0.954124	0.447	0.13	0	CAFs
GPX8	0	0.953421	0.37	0.039	0	CAFs
RCN11	0	0.951482	0.519	0.191	0	CAFs
COL18A11	0	0.950301	0.459	0.101	0	CAFs
LTBP41	0	0.949747	0.355	0.088	0	CAFs
SDC1	0	0.949303	0.27	0.099	0	CAFs
FIBIN	0	0.94825	0.275	0.005	0	CAFs
LTBP2	0	0.945904	0.294	0.016	0	CAFs
ADD3	0	0.945391	0.51	0.149	0	CAFs
FILIP1L1	0	0.945099	0.386	0.098	0	CAFs
LRRC17	0	0.943195	0.263	0.007	0	CAFs
TPM41	0	0.941377	0.704	0.485	0	CAFs
RBMS31	0	0.940223	0.357	0.037	0	CAFs
MARCKS	0	0.93791	0.549	0.198	0	CAFs
RRBP11	0	0.937017	0.547	0.246	0	CAFs
GAS61	0	0.9331	0.38	0.112	0	CAFs
PTN	0	0.932982	0.344	0.043	0	CAFs
CYB5R31	0	0.931008	0.635	0.308	0	CAFs
MIR99AHG	0	0.929796	0.321	0.018	0	CAFs
SPARCL11	0	0.922724	0.776	0.177	0	CAFs
C10orf101	0	0.920069	0.237	0.08	0	CAFs
BOC	0	0.918264	0.298	0.021	0	CAFs
SPHK11	0	0.9154	0.326	0.081	0	CAFs
FAM114A1	0	0.911174	0.427	0.11	0	CAFs
PLEKHH2	0	0.907431	0.241	0.011	0	CAFs
BICC1	0	0.905435	0.296	0.003	0	CAFs
ZFHX4	0	0.898245	0.308	0.005	0	CAFs
HSPB6	0	0.898194	0.233	0.023	0	CAFs
MMP23B	0	0.892898	0.262	0.005	0	CAFs
PPFIBP11	0	0.890827	0.427	0.094	0	CAFs
GAS1	0	0.878201	0.261	0.007	0	CAFs
PHLDB1	0	0.878181	0.348	0.05	0	CAFs
FAM127A1	0	0.876717	0.502	0.197	0	CAFs
TGFB1I11	0	0.875888	0.416	0.085	0	CAFs
HCFC1R1	0	0.871731	0.535	0.279	0	CAFs
FHL1	0	0.870723	0.355	0.053	0	CAFs
RGMA	0	0.870225	0.255	0.018	0	CAFs
ARF4	0	0.869971	0.717	0.468	0	CAFs
ADAMTS12	0	0.865037	0.291	0.007	0	CAFs
SDC2	0	0.862995	0.367	0.071	0	CAFs
ITGB5	0	0.861083	0.335	0.062	0	CAFs
DLK1	0	0.860228	0.129	0.014	0	CAFs
CD811	0	0.859895	0.526	0.24	0	CAFs
CPQ	0	0.858502	0.402	0.088	0	CAFs
SPRY11	0	0.853666	0.424	0.118	0	CAFs
MEIS2	0	0.850722	0.313	0.024	0	CAFs
PSAP	0	0.847585	0.863	0.5	0	CAFs
SH3PXD2B	0	0.844381	0.306	0.03	0	CAFs
ADAMTS2	0	0.842979	0.295	0.014	0	CAFs
MAP1B1	0	0.83778	0.374	0.087	0	CAFs
PAM1	0	0.837382	0.368	0.079	0	CAFs
PTK7	0	0.836938	0.283	0.032	0	CAFs
WNT2	0	0.834651	0.252	0.001	0	CAFs
PCDH18	0	0.834535	0.266	0.008	0	CAFs
FKBP7	0	0.832992	0.33	0.039	0	CAFs
KDELR3	0	0.830334	0.329	0.062	0	CAFs
COL4A21	0	0.825929	0.42	0.098	0	CAFs
ACTN11	0	0.816352	0.499	0.227	0	CAFs
RHOBTB3	0	0.81407	0.377	0.096	0	CAFs
LEPROT1	0	0.806289	0.57	0.262	0	CAFs
ANGPTL4	0	0.806234	0.27	0.087	0	CAFs
FAM46A	0	0.804497	0.345	0.095	0	CAFs
MMP3	0	0.804169	0.104	0.002	0	CAFs
TPBG	0	0.794926	0.38	0.096	0	CAFs
LY6E	0	0.794427	0.819	0.568	0	CAFs
TWIST2	0	0.793545	0.27	0.003	0	CAFs
LAMC11	0	0.790899	0.351	0.063	0	CAFs
VAT11	0	0.789211	0.419	0.157	0	CAFs
DDR2	0	0.78743	0.322	0.028	0	CAFs
MAP1A	0	0.785816	0.311	0.031	0	CAFs
SOX41	0	0.783072	0.529	0.236	0	CAFs
RAMP1	0	0.779181	0.232	0.045	0	CAFs
FRMD6	0	0.777713	0.302	0.036	0	CAFs
PARVA1	0	0.775547	0.37	0.083	0	CAFs
ZBTB201	0	0.77245	0.435	0.14	0	CAFs
OAF1	0	0.769114	0.299	0.035	0	CAFs
FLNA	0	0.768566	0.564	0.283	0	CAFs
NFIA1	0	0.766935	0.374	0.168	0	CAFs
GOLIM41	0	0.766044	0.363	0.096	0	CAFs
APOE	0	0.763632	0.501	0.186	0	CAFs
COLEC12	0	0.760689	0.241	0.021	0	CAFs
SPOCK1	0	0.760271	0.238	0.002	0	CAFs
SPON1	0	0.76001	0.253	0.007	0	CAFs
DKK3	0	0.760004	0.306	0.052	0	CAFs
CTSL	0	0.757812	0.533	0.183	0	CAFs
OMD	0	0.75584	0.204	0.001	0	CAFs
SH3PXD2A	0	0.755366	0.301	0.044	0	CAFs
MMP19	0	0.751149	0.309	0.042	0	CAFs
VKORC1	0	0.750517	0.333	0.138	0	CAFs
VGLL41	0	0.747255	0.433	0.173	0	CAFs
RAB31	0	0.746847	0.412	0.163	0	CAFs
CLMP	0	0.746552	0.27	0.008	0	CAFs
SNAI2	0	0.745939	0.259	0.022	0	CAFs
TGFB3	0	0.744794	0.262	0.027	0	CAFs
PDLIM2	0	0.744488	0.436	0.152	0	CAFs
LOXL21	0	0.744306	0.255	0.029	0	CAFs
PLOD2	0	0.743573	0.248	0.036	0	CAFs
EPHX11	0	0.742981	0.445	0.183	0	CAFs
DAB21	0	0.742853	0.489	0.113	0	CAFs
TNFRSF12A	0	0.740071	0.371	0.178	0	CAFs
LTBP3	0	0.739986	0.369	0.143	0	CAFs
TUBA1A	0	0.739789	0.709	0.434	0	CAFs
INAFM1	0	0.735708	0.314	0.078	0	CAFs
GAS7	0	0.735375	0.272	0.029	0	CAFs
KDELR2	0	0.73502	0.618	0.391	0	CAFs
ITM2B1	0	0.734863	0.909	0.716	0	CAFs
HSPG21	0	0.731276	0.456	0.086	0	CAFs
CD276	0	0.728665	0.315	0.063	0	CAFs
SLIT2	0	0.728525	0.232	0.003	0	CAFs
FKBP91	0	0.72783	0.338	0.075	0	CAFs
WWTR11	0	0.724258	0.378	0.099	0	CAFs
TPST1	0	0.724221	0.303	0.03	0	CAFs
DCLK1	0	0.721657	0.227	0.011	0	CAFs
TMEM45A	0	0.718816	0.274	0.051	0	CAFs
DLC11	0	0.718404	0.338	0.063	0	CAFs
VCAM11	0	0.717688	0.245	0.043	0	CAFs
PLD3	0	0.717509	0.558	0.264	0	CAFs
LAMP5	0	0.714162	0.153	0.007	0	CAFs
LAMB21	0	0.713534	0.328	0.089	0	CAFs
COX7A11	0	0.713025	0.319	0.071	0	CAFs
CXCL1	0	0.710224	0.101	0.02	0	CAFs
C12orf57	0	0.707347	0.826	0.589	0	CAFs
PHPT1	0	0.706514	0.6	0.377	0	CAFs
SRPX2	0	0.705906	0.251	0.006	0	CAFs
CKAP4	0	0.705469	0.347	0.099	0	CAFs
PDGFD	0	0.704013	0.215	0.016	0	CAFs
EPB41L2	0	0.703003	0.306	0.059	0	CAFs
RSPO31	0	0.700807	0.167	0.014	0	CAFs
ADGRA2	0	0.69818	0.262	0.027	0	CAFs
PXDN1	0	0.697683	0.283	0.053	0	CAFs
FMOD	0	0.696302	0.303	0.049	0	CAFs
TNFRSF1A1	0	0.696236	0.518	0.243	0	CAFs
ZCCHC24	0	0.695085	0.272	0.03	0	CAFs
TMEM2041	0	0.693646	0.319	0.071	0	CAFs
FXYD6	0	0.693619	0.255	0.04	0	CAFs
HMCN1	0	0.693168	0.234	0.006	0	CAFs
HDLBP	0	0.691187	0.547	0.299	0	CAFs
GPM6B	0	0.688265	0.226	0.05	0	CAFs
LRRC15	0	0.687936	0.186	0.001	0	CAFs
OSR1	0	0.686848	0.184	0.007	0	CAFs
NFIX	0	0.685261	0.294	0.07	0	CAFs
PRDX41	0	0.684303	0.518	0.286	0	CAFs
AADACL2-AS1	0	0.683168	0.166	0.002	0	CAFs
SEC31A	0	0.680521	0.46	0.205	0	CAFs
SGCB	0	0.679638	0.284	0.054	0	CAFs
ECM2	0	0.679241	0.238	0.015	0	CAFs
F2RL2	0	0.679034	0.201	0.003	0	CAFs
SMIM3	0	0.675274	0.328	0.081	0	CAFs
SFRP1	0	0.673971	0.202	0.055	0	CAFs
SPATS2L	0	0.673733	0.374	0.121	0	CAFs
PHACTR21	0	0.673608	0.35	0.132	0	CAFs
FMO2	0	0.672001	0.141	0.02	0	CAFs
LXN1	0	0.667989	0.208	0.063	0	CAFs
GJB2	0	0.667942	0.139	0.009	0	CAFs
TNC	0	0.667148	0.136	0.028	0	CAFs
PLPP11	0	0.666756	0.457	0.13	0	CAFs
PTGES	0	0.664664	0.206	0.027	0	CAFs
ANK2	0	0.663322	0.201	0.008	0	CAFs
TUBB61	0	0.663074	0.353	0.098	0	CAFs
TAC1	0	0.663038	0.111	0.001	0	CAFs
KANK2	0	0.662785	0.295	0.041	0	CAFs
TTC3	0	0.661304	0.57	0.325	0	CAFs
GLG1	0	0.660729	0.417	0.161	0	CAFs
FCGRT1	0	0.659598	0.614	0.282	0	CAFs
IFI27L2	0	0.659497	0.468	0.197	0	CAFs
FAM20A	0	0.658955	0.235	0.03	0	CAFs
PLSCR41	0	0.658725	0.267	0.034	0	CAFs
CREB3L1	0	0.657674	0.269	0.04	0	CAFs
NDN	0	0.657374	0.262	0.031	0	CAFs
C11orf96	0	0.655589	0.254	0.05	0	CAFs
ITGA11	0	0.655152	0.187	0.004	0	CAFs
TNN	0	0.653331	0.147	0.001	0	CAFs
SCG5	0	0.65305	0.196	0.007	0	CAFs
TSC22D11	0	0.651903	0.604	0.32	0	CAFs
PRICKLE1	0	0.650878	0.237	0.012	0	CAFs
CMTM3	0	0.6504	0.395	0.145	0	CAFs
PDLIM4	0	0.649878	0.321	0.075	0	CAFs
BMP1	0	0.648874	0.246	0.029	0	CAFs
P4HA2	0	0.647516	0.266	0.052	0	CAFs
CRABP2	0	0.647046	0.445	0.163	0	CAFs
PTMS1	0	0.645581	0.634	0.391	0	CAFs
RNASE4	0	0.641639	0.227	0.048	0	CAFs
ARID5B	0	0.640306	0.61	0.333	0	CAFs
C1QTNF6	0	0.637956	0.221	0.018	0	CAFs
OLFML1	0	0.637483	0.224	0.01	0	CAFs
RBP1	0	0.637178	0.318	0.086	0	CAFs
PLOD11	0	0.636687	0.303	0.087	0	CAFs
FERMT21	0	0.635648	0.322	0.088	0	CAFs
ST5	0	0.632116	0.261	0.042	0	CAFs
NID2	0	0.631862	0.228	0.013	0	CAFs
FNDC1	0	0.631812	0.164	0.001	0	CAFs
MATN3	0	0.630953	0.156	0.017	0	CAFs
PLS31	0	0.628274	0.308	0.07	0	CAFs
MITF	0	0.626903	0.233	0.038	0	CAFs
TSPAN31	0	0.626681	0.421	0.188	0	CAFs
BDH21	0	0.62465	0.326	0.093	0	CAFs
ABCA10	0	0.624538	0.147	0.002	0	CAFs
GINM11	0	0.624396	0.443	0.198	0	CAFs
TSHZ21	0	0.622981	0.34	0.093	0	CAFs
GULP11	0	0.619701	0.24	0.029	0	CAFs
STEAP1	0	0.618078	0.214	0.038	0	CAFs
SULF21	0	0.617847	0.265	0.068	0	CAFs
TCEAL41	0	0.614014	0.506	0.259	0	CAFs
REXO21	0	0.612693	0.496	0.253	0	CAFs
SEMA5A	0	0.608364	0.2	0.014	0	CAFs
LDB21	0	0.606653	0.267	0.054	0	CAFs
LMAN1	0	0.606226	0.523	0.301	0	CAFs
ADH5	0	0.605396	0.424	0.198	0	CAFs
STRA6	0	0.604444	0.172	0.002	0	CAFs
ATRAID	0	0.602858	0.608	0.385	0	CAFs
PLBD1	0	0.599949	0.274	0.077	0	CAFs
PTGFRN	0	0.598924	0.236	0.024	0	CAFs
EBF11	0	0.598766	0.272	0.057	0	CAFs
GLT8D1	0	0.598155	0.343	0.109	0	CAFs
MSRB31	0	0.596262	0.297	0.062	0	CAFs
NEXN	0	0.594117	0.233	0.032	0	CAFs
MGST31	0	0.592586	0.724	0.467	0	CAFs
DDAH21	0	0.592558	0.484	0.27	0	CAFs
HEXB	0	0.592461	0.43	0.219	0	CAFs
RBFOX21	0	0.591297	0.282	0.062	0	CAFs
GREM1	0	0.59116	0.136	0.001	0	CAFs
NPC21	0	0.589243	0.784	0.448	0	CAFs
SH3BP51	0	0.586703	0.402	0.172	0	CAFs
ACTA2	0	0.58658	0.523	0.15	0	CAFs
ESD	0	0.583038	0.512	0.269	0	CAFs
BNC2	0	0.582356	0.223	0.011	0	CAFs
SLC44A1	0	0.582196	0.34	0.119	0	CAFs
GNG121	0	0.579021	0.311	0.1	0	CAFs
OLFM2	0	0.578543	0.208	0.026	0	CAFs
PKIG1	0	0.578052	0.337	0.126	0	CAFs
DTWD1	0	0.575882	0.301	0.106	0	CAFs
PLAT1	0	0.575666	0.298	0.071	0	CAFs
MAGED1	0	0.575175	0.321	0.115	0	CAFs
TCEAL81	0	0.574713	0.377	0.154	0	CAFs
TSKU	0	0.574419	0.233	0.043	0	CAFs
HSP90B11	0	0.573472	0.772	0.555	0	CAFs
ILK	0	0.568804	0.484	0.251	0	CAFs
CHRDL1	0	0.568591	0.153	0.003	0	CAFs
EGFR	0	0.5676	0.219	0.035	0	CAFs
SLC39A13	0	0.565375	0.283	0.065	0	CAFs
FAM3C	0	0.565129	0.393	0.169	0	CAFs
ITGAV1	0	0.565055	0.331	0.124	0	CAFs
TUSC31	0	0.564831	0.301	0.087	0	CAFs
CCPG11	0	0.564442	0.401	0.182	0	CAFs
P3H1	0	0.564136	0.247	0.047	0	CAFs
VASN	0	0.563828	0.269	0.066	0	CAFs
AXL	0	0.563661	0.247	0.047	0	CAFs
SH3D19	0	0.562839	0.236	0.029	0	CAFs
NR2F1-AS1	0	0.562607	0.192	0.007	0	CAFs
NUCB11	0	0.561859	0.529	0.307	0	CAFs
FOXO3	0	0.561629	0.324	0.137	0	CAFs
ZEB11	0	0.561294	0.322	0.088	0	CAFs
EGR2	0	0.560235	0.277	0.085	0	CAFs
KIAA1217	0	0.558879	0.269	0.079	0	CAFs
COL4A11	0	0.558375	0.312	0.082	0	CAFs
CLIC41	0	0.55653	0.353	0.15	0	CAFs
LPAR1	0	0.554875	0.205	0.007	0	CAFs
LEPR1	0	0.552752	0.125	0.02	0	CAFs
PLPP4	0	0.551758	0.149	0.001	0	CAFs
FUCA2	0	0.549559	0.341	0.145	0	CAFs
FBXO17	0	0.549148	0.219	0.017	0	CAFs
CHID1	0	0.5491	0.379	0.178	0	CAFs
ANTXR2	0	0.548348	0.245	0.049	0	CAFs
RAI141	0	0.545138	0.244	0.054	0	CAFs
MAP1LC3A1	0	0.54467	0.395	0.186	0	CAFs
CDKN2C	0	0.544454	0.231	0.052	0	CAFs
C5orf15	0	0.543908	0.343	0.134	0	CAFs
LHFPL2	0	0.543796	0.232	0.052	0	CAFs
KIAA0930	0	0.543048	0.241	0.06	0	CAFs
NOTCH2	0	0.542924	0.293	0.101	0	CAFs
EMP21	0	0.541888	0.475	0.238	0	CAFs
EEA11	0	0.541664	0.344	0.145	0	CAFs
CDKN1C1	0	0.541217	0.234	0.06	0	CAFs
FHL2	0	0.541044	0.329	0.102	0	CAFs
MPZL1	0	0.540103	0.321	0.142	0	CAFs
CTTN1	0	0.539926	0.317	0.129	0	CAFs
CDK4	0	0.539623	0.42	0.215	0	CAFs
DSEL	0	0.538376	0.22	0.025	0	CAFs
PROS11	0	0.537828	0.219	0.042	0	CAFs
VCL	0	0.536983	0.315	0.112	0	CAFs
SPTBN11	0	0.533186	0.375	0.178	0	CAFs
FAM198B1	0	0.533044	0.288	0.093	0	CAFs
MEDAG	0	0.532103	0.14	0.007	0	CAFs
RP11-417E7.2	0	0.531619	0.15	0.001	0	CAFs
PODNL1	0	0.530613	0.188	0.008	0	CAFs
SEC24D	0	0.530466	0.286	0.086	0	CAFs
NOX4	0	0.530299	0.174	0.004	0	CAFs
PGRMC1	0	0.528218	0.494	0.262	0	CAFs
CTSO	0	0.52487	0.257	0.066	0	CAFs
MXRA7	0	0.523602	0.225	0.035	0	CAFs
PHLDA3	0	0.52286	0.243	0.062	0	CAFs
GFPT2	0	0.522167	0.194	0.008	0	CAFs
GSTM5	0	0.522102	0.155	0.002	0	CAFs
PLIN3	0	0.521819	0.374	0.175	0	CAFs
UNC5B	0	0.52163	0.196	0.027	0	CAFs
SORBS31	0	0.518342	0.37	0.151	0	CAFs
MT1E	0	0.518115	0.463	0.164	0	CAFs
P3H3	0	0.517556	0.199	0.013	0	CAFs
PRNP	0	0.516364	0.557	0.246	0	CAFs
LTBR1	0	0.515657	0.38	0.179	0	CAFs
NR2F21	0	0.514651	0.303	0.117	0	CAFs
EDNRA	0	0.512579	0.202	0.035	0	CAFs
TGFBR31	0	0.51095	0.233	0.064	0	CAFs
MYOF1	0	0.509202	0.282	0.101	0	CAFs
GLMP	0	0.508341	0.308	0.122	0	CAFs
TCEAL7	0	0.507549	0.149	0.008	0	CAFs
GALNT16	0	0.50655	0.149	0.011	0	CAFs
F3	0	0.505889	0.148	0.031	0	CAFs
SCARA5	0	0.505736	0.118	0.001	0	CAFs
LMO4	0	0.504152	0.394	0.192	0	CAFs
APP1	0	0.503343	0.591	0.311	0	CAFs
RECK	0	0.502263	0.21	0.029	0	CAFs
LINC011161	0	0.498186	0.214	0.037	0	CAFs
COL5A3	0	0.497555	0.153	0.015	0	CAFs
LMCD11	0	0.497275	0.313	0.124	0	CAFs
EDNRB1	0	0.495774	0.163	0.032	0	CAFs
APOL11	0	0.494713	0.217	0.06	0	CAFs
NT5E1	0	0.49449	0.202	0.025	0	CAFs
PCDH7	0	0.49398	0.175	0.005	0	CAFs
SGCD	0	0.492942	0.179	0.002	0	CAFs
P3H4	0	0.492651	0.226	0.045	0	CAFs
ABCA9	0	0.492058	0.129	0.001	0	CAFs
ARHGAP21	0	0.491834	0.222	0.051	0	CAFs
STEAP2	0	0.489959	0.178	0.034	0	CAFs
SLC40A1	0	0.488199	0.376	0.159	0	CAFs
GPC1	0	0.48647	0.186	0.04	0	CAFs
CNRIP11	0	0.486106	0.247	0.05	0	CAFs
NOVA1	0	0.48601	0.146	0.015	0	CAFs
CTSB	0	0.485591	0.691	0.386	0	CAFs
FSTL3	0	0.485346	0.196	0.03	0	CAFs
GPX7	0	0.485292	0.242	0.053	0	CAFs
PFN2	0	0.485015	0.317	0.127	0	CAFs
UBE2E2	0	0.482414	0.269	0.098	0	CAFs
SSC5D	0	0.480956	0.174	0.009	0	CAFs
CASC4	0	0.478411	0.298	0.115	0	CAFs
KLF91	0	0.477336	0.337	0.146	0	CAFs
CYP7B1	0	0.476435	0.18	0.021	0	CAFs
LTBP1	0	0.47614	0.192	0.032	0	CAFs
MMP16	0	0.475056	0.147	0.006	0	CAFs
MYH10	0	0.474683	0.204	0.032	0	CAFs
TUBB	0	0.473799	0.766	0.516	0	CAFs
F10	0	0.473563	0.152	0.007	0	CAFs
HIC1	0	0.473123	0.188	0.02	0	CAFs
CDO1	0	0.472456	0.162	0.008	0	CAFs
OSR2	0	0.471484	0.157	0.017	0	CAFs
EVA1A	0	0.469457	0.188	0.019	0	CAFs
DST1	0	0.469114	0.339	0.13	0	CAFs
NTM	0	0.467726	0.146	0.003	0	CAFs
ENC1	0	0.467129	0.199	0.063	0	CAFs
RNF24	0	0.466834	0.251	0.079	0	CAFs
ANGPTL1	0	0.466106	0.128	0.007	0	CAFs
GOLM1	0	0.466059	0.244	0.088	0	CAFs
ARHGAP1	0	0.46555	0.269	0.097	0	CAFs
SHISA4	0	0.464955	0.232	0.057	0	CAFs
EHD21	0	0.464631	0.3	0.085	0	CAFs
TRIO	0	0.464481	0.202	0.052	0	CAFs
UGDH	0	0.464068	0.316	0.119	0	CAFs
PHYHD1	0	0.462726	0.19	0.044	0	CAFs
CPZ	0	0.462622	0.139	0.001	0	CAFs
ZMAT3	0	0.462072	0.226	0.071	0	CAFs
C1QTNF4	0	0.461309	0.152	0.003	0	CAFs
CDKN2A	0	0.461281	0.223	0.072	0	CAFs
SNHG18	0	0.459619	0.189	0.026	0	CAFs
CAPN6	0	0.458882	0.113	0.001	0	CAFs
LRRN4CL	0	0.458634	0.136	0.001	0	CAFs
PTGIS	0	0.458466	0.13	0.006	0	CAFs
TEAD1	0	0.455378	0.216	0.042	0	CAFs
IL1R11	0	0.454151	0.211	0.046	0	CAFs
GXYLT2	0	0.45387	0.163	0.003	0	CAFs
RP11-834C11.4	0	0.453328	0.188	0.032	0	CAFs
CPED1	0	0.452714	0.181	0.028	0	CAFs
MT1M1	0	0.449991	0.217	0.06	0	CAFs
[truncated: 7,169 more rows]

## Sheet: Supplementary Table 2
Supplementary Table 2. List of the top 5,000 gene modules of WGCNA.
probes	color
ATHL1	black
RP11-326C3.2	black
EVA1B	black
ESPN	black
NEAT1	black
NOXA1	black
CSAD	black
MIR429	black
MIR25	black
MIR647	black
MALAT1	black
PABPC1L	black
SH3D21	black
PDE6B	black
ANKRD10-IT1	black
PAQR6	black
MIR3685	black
RP11-285F7.2	black
SNORD14A	black
RP11-268J15.5	black
GOLGA8A	black
RP11-496I9.1	black
RP11-449J21.3	black
RP11-1191J2.5	black
ZMAT1	black
SLC25A29	black
TLE2	black
MIRLET7D	black
CCDC24	black
PLEKHG4	black
AC253576.2	black
ZSCAN18	black
RP11-521B24.5	black
CTD-2228K2.7	black
AC093838.4	black
BZRAP1	black
RP11-465B22.8	black
AC023283.1	black
SNORD100	black
RP11-1055B8.4	black
SGSM2	black
MAPK8IP3	black
MIR4292	black
LENG8	black
LAMA5	black
ANO9	black
KAT2A	black
RP11-347I19.8	black
LINC01176	black
RPL37P2	black
MIR570	black
PRRT2	black
MYO15B	black
MIR3677	black
UBXN11	black
TNFRSF25	black
TNFRSF14	black
C19orf71	black
ZNF692	black
RAB24	black
RP11-488L18.4	black
PCSK4	black
PDCL3P4	black
RP11-190A12.8	black
MIR3176	black
RP11-488L18.10	black
MIR5587	black
CTD-2537I9.12	black
GABBR1	black
CMB9-55F22.1	black
SH3GLB2	black
PYROXD2	black
NEIL1	black
Z98750.1	black
PLXNB1	black
D2HGDH	black
GOLGA8B	black
CCNL2	black
AC024361.1	black
LINC00342	black
MTMR9LP	black
MIR1254-1	black
RNU6-850P	black
DDX39B	black
ARGLU1	black
RP11-274B21.4	black
IDUA	black
AL590431.1	black
RGL2	black
SNORD6	black
SDHAP3	black
AHSA2	black
RSRP1	black
ARHGAP33	black
ANKRD10	black
RP11-274B21.3	black
RP11-157P1.4	black
TARBP1	black
CLK1	black
HSF4	black
AC006128.2	black
AC006273.5	black
HNRNPU-AS1	black
DFNB31	black
MICALL2	black
ECHDC2	black
RP11-274B21.2	black
STAG3L5P	black
PCED1A	black
RP1-202O8.2	black
RP11-589P10.5	black
ATG16L2	black
MIR200A	black
RP13-104F24.3	black
RNU6-882P	black
SNHG12	black
MZF1	black
FAM86FP	black
PIDD1	black
HEXDC	black
RP11-465B22.3	black
LMNTD2	black
MIR6835	black
LINC00106	black
SNRNP70	black
ASMTL-AS1	black
AP006621.6	black
VAMP1	black
TNK2	black
RP11-504P24.8	black
CROCC	black
MLLT6	black
RP11-159D12.2	black
PTOV1-AS2	black
HOOK2	black
CROCCP2	black
LTF	blue
SAA1	blue
CCL19	blue
CXCL9	blue
CXCL13	blue
CCL21	blue
FDCSP	blue
IFI6	blue
SPP1	blue
HCG4P5	blue
ISG15	blue
CXCL10	blue
HLA-DQA2	blue
MMP9	blue
LYZ	blue
COX6C	blue
IFI27	blue
MX1	blue
PIGR	blue
CCL5	blue
UBD	blue
CXCL11	blue
PTGDS	blue
TRBC2	blue
CTA-384D8.31	blue
HLA-DRB5	blue
CD52	blue
BST2	blue
CD3D	blue
CD2	blue
TRAC	blue
NKG7	blue
IL2RG	blue
LTB	blue
CCL18	blue
OAS2	blue
CD3E	blue
PLA2G2A	blue
RGS1	blue
TRBV28	blue
HLA-DQB1	blue
GZMK	blue
C3	blue
HLA-DQB2	blue
SOD3	blue
ADAMDEC1	blue
GZMA	blue
RSAD2	blue
HLA-DRB6	blue
IFIT3	blue
APOE	blue
OAS1	blue
CCL2	blue
PDE4B	blue
HLA-DQA1	blue
OR2I1P	blue
IFI44	blue
SECTM1	blue
OASL	blue
IFITM1	blue
IL7R	blue
CELSR2	blue
C10orf10	blue
APOC1	blue
FPR3	blue
LY6E	blue
GBP1	blue
SELL	blue
IFI44L	blue
ST6GAL1	blue
HERC6	blue
TMEM176B	blue
CD27	blue
STAT1	blue
PTPRC	blue
CD163	blue
CST7	blue
RTP4	blue
IL4I1	blue
FOLR2	blue
CYBB	blue
FMO2	blue
IL32	blue
OAS3	blue
PSMB9	blue
PLA2G7	blue
SPOCK2	blue
C1QB	blue
GBP4	blue
HLA-DRA	blue
FCGR3A	blue
C1QA	blue
HCP5	blue
GPR183	blue
HLA-DPA1	blue
TAP1	blue
CCL8	blue
SRGN	blue
CECR1	blue
LAMP3	blue
ACSL5	blue
HLA-DRB1	blue
IL2RB	blue
TMEM176A	blue
IFIT2	blue
NAPSB	blue
PLEK	blue
SLAMF8	blue
CYBA	blue
ALPL	blue
SLAMF7	blue
SYT7	blue
IDO1	blue
HLA-F	blue
FAM26F	blue
FGL2	blue
HLA-DPB1	blue
TYMP	blue
CTSS	blue
CD8A	blue
CD74	blue
C1QC	blue
OLR1	blue
CYP1B1	blue
RBP5	blue
SOCS3	blue
CSTA	blue
HLA-H	blue
BIRC3	blue
LCP1	blue
ITGB2	blue
CD48	blue
ANKRD22	blue
ACP5	blue
CD53	blue
SAMD9L	blue
RNASE1	blue
IL27RA	blue
CYP27A1	blue
LGALS2	blue
LCK	blue
SAA2	blue
GBP5	blue
HLA-A	blue
HLA-B	blue
CLIC3	blue
GIMAP7	blue
MPEG1	blue
ITM2C	blue
CTSW	blue
TRBV20-1	blue
CD82	blue
CORO1A	blue
ADAM8	blue
FAIM3	blue
CMPK2	blue
DDX60	blue
S100A4	blue
KLHDC7B	blue
HLA-DOA	blue
CCR7	blue
SEL1L3	blue
HCST	blue
PRR36	blue
HLA-DMA	blue
APOBEC3C	blue
ALDH2	blue
FXYD5	blue
EVI2B	blue
CBR3	blue
IRF7	blue
CYTIP	blue
VSIG4	blue
CD4	blue
CLEC10A	blue
CD5	blue
CCR5	blue
RP11-675F6.3	blue
UNC13D	blue
TGM2	blue
ADD3	blue
VCAM1	blue
CXCR3	blue
RUNX3	blue
ZFP36L2	blue
ARID5A	blue
CCR1	blue
TNFAIP3	blue
TMSB4XP8	blue
SLFN5	blue
BCL2A1	blue
SASH3	blue
SAMD9	blue
IFITM3	blue
ICAM1	blue
FCER1G	blue
EPSTI1	blue
PLBD1	blue
CXCR4	blue
CTD-3252C9.4	blue
CPVL	blue
CCL22	blue
CTA-384D8.35	blue
HLA-DMB	blue
TYROBP	blue
CCL4L1	blue
ALOX5AP	blue
APOL1	blue
RAC2	blue
MSR1	blue
LAPTM5	blue
SELPLG	blue
BATF2	blue
TRBJ2-7	blue
ITGAL	blue
CHDH	blue
LSP1	blue
FYB	blue
B2M	blue
CCL3	blue
DOK2	blue
DUSP2	blue
PLTP	blue
SIT1	blue
GZMB	blue
SLC16A3	blue
HERC5	blue
PRF1	blue
CCDC69	blue
TNFRSF1B	blue
LIMD2	blue
TREM2	blue
HCLS1	blue
SLAMF6	blue
LGALS9	blue
TRIM22	blue
APOBR	blue
MTL5	blue
SPNS2	blue
MNDA	blue
PSMB8	blue
FERMT3	blue
TNFAIP2	blue
PLIN2	blue
FLNB	blue
HMOX1	blue
IFI35	blue
CD14	blue
ETV7	blue
CMAHP	blue
IL10RA	blue
CCL4	blue
ALOX5	blue
CD79B	blue
GZMH	blue
CSF1R	blue
GBP2	blue
DDX58	blue
IRX5	blue
IFI16	blue
SIGLEC1	blue
IFIH1	blue
SPI1	blue
COTL1	blue
PLAUR	blue
SOCS1	blue
TNFSF13B	blue
APOL6	blue
MS4A4A	blue
AIF1	blue
MIR4645	blue
UBE2L6	blue
TRBV7-9	blue
HLA-C	blue
PCED1B	blue
HLA-E	blue
DAPP1	blue
CTSC	blue
CD69	blue
SELE	blue
PIM1	blue
CSF2RB	blue
IRF8	blue
TSPAN33	blue
IL18	blue
C2	blue
GPSM3	blue
C3AR1	blue
CD1C	blue
FKBP4	blue
SDS	blue
ARHGDIB	blue
NCF2	blue
TPD52	blue
HLA-DOB	blue
MS4A6A	blue
IKZF3	blue
MRC1	blue
HCK	blue
GMFG	blue
CD7	blue
GIMAP2	blue
ITGAM	blue
GZMM	blue
GIMAP4	blue
UBE2E2	blue
RNASE6	blue
AOAH	blue
CASP1	blue
GYPC	blue
SOD2	blue
SLCO2B1	blue
C10orf54	blue
EVA1C	blue
GNA15	blue
STAT5A	blue
THEMIS2	blue
CD8B	blue
CSF1	blue
PLSCR1	blue
PARP14	blue
PTAFR	blue
FAM84B	blue
RENBP	blue
CD97	blue
FUOM	blue
HSPA7	blue
APOL4	blue
ZC3H12A	blue
EMP3	blue
CD37	blue
HLA-G	blue
VAMP5	blue
LILRB4	blue
SAMHD1	blue
IL24	blue
USP18	blue
CD86	blue
PLEKHF1	blue
TRIM47	blue
FAM20C	blue
CD40	blue
UBA7	blue
RP11-33E12.2	blue
EVI2A	blue
PIK3AP1	blue
CLEC5A	blue
ARHGAP4	blue
RGCC	blue
IFI27L2	blue
PPM1K	blue
KLRB1	blue
RAB29	blue
WAS	blue
RASSF5	blue
CELF2	blue
ARHGAP30	blue
APOBEC3G	blue
PSMB8-AS1	blue
APBB1IP	blue
APOL3	blue
CAPG	blue
RAB20	blue
CD83	blue
FOXP3	blue
DPYD	blue
GALM	blue
TAP2	blue
MMP12	blue
IRF1	blue
ERLIN2	blue
SLC2A3	blue
TAGAP	blue
HNRNPA1P21	blue
LY96	blue
NCKAP1L	blue
SCPEP1	blue
SLC18B1	blue
CD84	blue
GIMAP6	blue
MARCKS	blue
LST1	blue
IGSF6	blue
GLRX	blue
NLRC5	blue
SLFN11	blue
SYK	blue
CAMK2D	blue
C5AR1	blue
SH2D2A	blue
ACSL4	blue
SERPINB9P1	blue
GNLY	blue
FPR1	blue
CPM	blue
RASSF2	blue
CEBPA	blue
P2RY10	blue
TRBJ2-3	blue
PSMB10	blue
MOXD1	blue
WIPF1	blue
DAPK1	blue
DPYSL2	blue
EPB41L2	blue
EFHD2	blue
SAA2-SAA4	blue
ISG20	blue
CD96	blue
CCR2	blue
BTN3A3	blue
TLR4	blue
IL6R	blue
CCL13	blue
CCND2	blue
LYN	blue
HAVCR2	blue
HSD11B1	blue
TRBJ2-1	blue
RFTN1	blue
CTSL	blue
SLC15A3	blue
CLEC7A	blue
SGK1	blue
RELB	blue
SH2D1A	blue
NCF4	blue
NR3C1	blue
TCN2	blue
HCG4P7	blue
CHST11	blue
CARD16	blue
CLIC2	blue
HLA-DQB1-AS1	blue
BTN3A2	blue
PARP9	blue
WNT3	blue
CRNDE	blue
LYSMD2	blue
XAF1	blue
VAV1	blue
PSME2	blue
SDC4	blue
RGS10	blue
CD6	blue
EGFL6	blue
MYCL	blue
DOCK11	blue
SAMSN1	blue
LCP2	blue
MX2	blue
SLA	blue
C1orf162	blue
LBH	blue
CMKLR1	blue
TRIQK	blue
CCL17	blue
PTGER4	blue
SLC1A3	blue
TRBV19	blue
SLC7A7	blue
JAK3	blue
SERPINB9	blue
CD247	blue
LAIR1	blue
TRDC	blue
FAM105A	blue
TNFAIP8L2	blue
TFAP2A	blue
ADAM19	blue
SOAT1	blue
RPS6KA3	blue
ITGAX	blue
FCGR2A	blue
CXCL16	blue
IL4R	blue
TMSB4X	blue
MAP3K8	blue
BIN1	blue
AC092580.4	blue
CAMK1D	blue
PLEKHO1	blue
RGL1	blue
ARPC1B	blue
TRPV2	blue
FTL	blue
ROBO1	blue
TLR2	blue
LY86	blue
TLR7	blue
MMD	blue
TMC8	blue
INPP5D	blue
PAPLN	blue
DOCK8	blue
LAG3	blue
TRBV29-1	blue
EBI3	blue
RP11-686D22.7	blue
LPXN	blue
TMEM99	blue
PPP1R16B	blue
IL1B	blue
CSF2RA	blue
AKR1B1	blue
HLA-J	blue
RP11-9E17.1	blue
P2RY13	blue
CYTH4	blue
PARP8	blue
STK17B	blue
RCSD1	blue
VMO1	blue
TTYH3	blue
BTG1	blue
GCH1	blue
AC245100.1	blue
NOD2	blue
SPN	blue
STAB1	blue
GIMAP8	blue
TIGIT	blue
TMC6	blue
SLC2A6	blue
CTSH	blue
SKAP2	blue
IKZF1	blue
SERPINF2	blue
FGR	blue
TRPM2	blue
CCR4	blue
FAS	blue
CD22	blue
BCAT1	blue
RAB25	blue
BTN3A1	blue
BIN2	blue
DEF6	blue
RASA3	blue
SDC3	blue
CTA-384D8.36	blue
TNF	blue
MARCO	blue
EHBP1L1	blue
FES	blue
HMHA1	blue
RP11-156E6.1	blue
C16orf54	blue
LINC01272	blue
CLEC2B	blue
FHDC1	blue
CD3G	blue
PIK3CD	blue
MAP4K1	blue
DOCK2	blue
CIITA	blue
PTPN7	blue
CTD-2396E7.11	blue
MAP7	blue
MFNG	blue
LIF	blue
SLC37A2	blue
SAT1	blue
TNFRSF4	blue
PRDM1	blue
SLC43A2	blue
EMILIN2	blue
ABCA1	blue
S1PR4	blue
ERAP1	blue
PLA2G2D	blue
TRAV13-1	blue
OSM	blue
NFAM1	blue
TRAF1	blue
IKBKE	blue
DOCK10	blue
DDAH1	blue
ITGA4	blue
CXCL2	blue
CACNB3	blue
PDCD1LG2	blue
TLR3	blue
LIX1L	blue
RASSF4	blue
PLXND1	blue
AQP9	blue
DRAM1	blue
KIAA0922	blue
TCF7	blue
SP140L	blue
TMEM145	blue
OSCAR	blue
PITPNM1	blue
PTGS1	blue
HLA-K	blue
MICAL1	blue
HLA-U	blue
PLD4	blue
TLR1	blue
ZNF683	blue
FMNL1	blue
MBNL3	blue
APOBEC3D	blue
CCDC102A	blue
IL15RA	blue
CD300A	blue
HOMER2	blue
SLC1A2	blue
CTC-251I16.1	blue
TBC1D10C	blue
2001-09-01	blue
PILRA	blue
LGMN	blue
SFMBT2	blue
CARD11	blue
GAL3ST4	blue
ARHGAP9	blue
PPP1R18	blue
MYO1F	blue
TRANK1	blue
SIGLEC14	blue
RASAL3	blue
HK3	blue
LPAR6	blue
HN1L	blue
STX11	blue
LPCAT2	blue
SIRPG	blue
MAP3K5	blue
PCED1B-AS1	blue
TMEM173	blue
GGTA1P	blue
ADORA3	blue
IL18BP	blue
GSE1	blue
NMI	blue
MDFIC	blue
TRIM14	blue
CTLA4	blue
PLA1A	blue
FCGR1A	blue
GOT2	blue
ARHGAP25	blue
PALD1	blue
FYN	blue
C1orf56	blue
GDPD1	blue
RP11-353N4.6	blue
VASH1	blue
PLEKHA2	blue
SBF1	blue
PEX7	blue
CD1E	blue
2006-09-01	blue
GBP1P1	blue
ABI3	blue
CCL11	blue
SLFN12	blue
RAB32	blue
TNNT1	brown
CITED4	brown
SNCG	brown
EHF	brown
RBP1	brown
CRABP2	brown
RAMP1	brown
SNORD104	brown
GALNT3	brown
FBXO2	brown
HSH2D	brown
METRN	brown
PYCARD	brown
C5orf38	brown
TNFRSF18	brown
STMN3	brown
RPS28P7	brown
CRACR2B	brown
CNTD2	brown
CLPSL2	brown
CEBPD	brown
MDK	brown
EGFL7	brown
NPIPB15	brown
GADD45G	brown
CPNE7	brown
CTXN1	brown
H2AFJ	brown
FAT1	brown
PHLDA2	brown
RHOBTB3	brown
MT2A	brown
C4orf48	brown
TNFRSF12A	brown
WNT4	brown
SREBF1	brown
DMKN	brown
MIF	brown
MB	brown
CCDC85B	brown
TPPP3	brown
ITGA6	brown
SFN	brown
AK4	brown
BATF	brown
HES4	brown
ATAD3C	brown
ISYNA1	brown
FZD6	brown
ASPH	brown
CNFN	brown
RP11-927P21.4	brown
ITPR2	brown
AIM1	brown
FXYD3	brown
LRFN4	brown
CD109	brown
SELM	brown
SNHG9	brown
NME3	brown
LIMCH1	brown
B4GALNT4	brown
ODF3B	brown
ITGB8	brown
LRRC75B	brown
PLOD2	brown
NAV2	brown
U47924.27	brown
NAPRT	brown
PRSS8	brown
F12	brown
MZT2B	brown
SLC9A3R2	brown
LGR4	brown
SCRN1	brown
RP11-34P13.15	brown
CHCHD2P2	brown
WBSCR27	brown
CTC-575D19.1	brown
DNPH1	brown
NUPR1	brown
TMEM121	brown
DCXR	brown
ADAM9	brown
CTD-2325P2.4	brown
CCDC64B	brown
HOXC4	brown
HSD11B2	brown
RASSF7	brown
ADRA2C	brown
TMEM238	brown
MRPL12	brown
COMTD1	brown
IRX3	brown
PHLDA3	brown
TRIP6	brown
C1orf233	brown
AC009005.2	brown
FAM173A	brown
HSD17B14	brown
RAC3	brown
PACSIN3	brown
ACADS	brown
EMID1	brown
CHCHD2P9	brown
RNF208	brown
GNMT	brown
SNORD99	brown
SIGIRR	brown
CCDC78	brown
ABHD11-AS1	brown
MACROD1	brown
RNU6-1016P	brown
CMTM4	brown
ATP6V0E2	brown
CADM1	brown
TIMP1	brown
MESP1	brown
IER2	brown
PRSS22	brown
LAGE3	brown
HSPA1A	brown
DPM3	brown
TSTD1	brown
HAGHL	brown
TUBB2A	brown
ARL4D	brown
MZT2A	brown
ZBTB10	brown
CCDC64	brown
WASF3	brown
IER5L	brown
AMOT	brown
AC113189.5	brown
FKBP10	brown
RP4-758J18.10	brown
GDPD3	brown
SCAND1	brown
SPR	brown
DSG2	brown
SMARCD3	brown
MRPL41	brown
SNORD12B	brown
METRNL	brown
GGT7	brown
AGPAT2	brown
TSPO	brown
S100A13	brown
CTA-29F11.1	brown
AGPS	brown
PTMS	brown
PRKDC	brown
TST	brown
MAP1LC3A	brown
GCAT	brown
AC087350.1	brown
NAT14	brown
ZC2HC1A	brown
STRA13	brown
CBLC	brown
PNPLA2	brown
DPP7	brown
ZNHIT2	brown
ROGDI	brown
G6PC3	brown
CADM4	brown
ZNF704	brown
LBX2-AS1	brown
CD320	brown
ATP5D	brown
SCRN2	brown
JUND	brown
SARDH	brown
SYTL1	brown
C1orf53	brown
FAM110A	brown
CBX4	brown
PLEKHH3	brown
PPDPF	brown
NME1-NME2	brown
SDF2L1	brown
C9orf142	brown
RP11-380L11.4	brown
CTD-3184A7.4	brown
YPEL3	brown
AGRN	brown
SYCE3	brown
CHTF18	brown
CISD3	brown
ZNF296	brown
RP11-307C12.11	brown
RP11-532F12.5	brown
ARRDC3	brown
ALKBH7	brown
PPAP2C	brown
ADAM15	brown
AGAP2-AS1	brown
DECR2	brown
MT1F	brown
C19orf60	brown
SLC2A4RG	brown
JOSD2	brown
AC016708.2	brown
ETFB	brown
HRAS	brown
H1FX	brown
ALDH4A1	brown
PYCR1	brown
ROMO1	brown
UQCC3	brown
TFPT	brown
CDC42BPA	brown
UQCRQ	brown
RHOD	brown
OBSL1	brown
TCIRG1	brown
RPS7P1	brown
PEX11G	brown
FKBP2	brown
SPG20	brown
C6orf226	brown
VWA1	brown
NTHL1	brown
EME2	brown
EPS8L2	brown
ENAH	brown
SLC25A10	brown
RP11-329L6.2	brown
GALE	brown
BBC3	brown
RP11-799B12.1	brown
DUSP23	brown
ELMO3	brown
DDAH2	brown
WDR90	brown
WASH7P	brown
EVPL	brown
ZNF219	brown
FDXR	brown
ECI1	brown
TRABD	brown
PODXL	brown
MVD	brown
AURKAIP1	brown
RP11-266L9.8	brown
ARHGEF19	brown
LRRC45	brown
TRAPPC6A	brown
PIM3	brown
PPP1R35	brown
DBN1	brown
BRSK1	brown
TELO2	brown
MFAP3L	brown
MT1DP	brown
FAM195A	brown
PHPT1	brown
NDUFA4L2	brown
ATP2B4	brown
CTD-2267D19.3	brown
DMPK	brown
MYEOV2	brown
ABLIM1	brown
OXLD1	brown
CTD-2227E11.1	brown
RP5-908M14.9	brown
MAFG-AS1	brown
ZNF358	brown
SPATC1L	brown
NDUFB7	brown
SHISA4	brown
TMEM160	brown
YDJC	brown
NME4	brown
PIGQ	brown
SDSL	brown
PDP1	brown
CHPF	brown
SLC50A1	brown
LYPLA1	brown
JADE3	brown
FAM171B	brown
SORBS3	brown
CLDN7	brown
ILF3-AS1	brown
RNU7-49P	brown
SNAPC2	brown
FZD2	brown
TMEM54	brown
ANAPC11	brown
DRAP1	brown
SEPHS2	brown
TMEM141	brown
LINC01023	brown
NAA38	brown
SNHG7	brown
FLYWCH2	brown
ARSA	brown
HOXC13-AS	brown
MRPL24	brown
TBC1D4	brown
RRM2B	brown
MRPS21	brown
CPNE3	brown
PEX6	brown
NOL3	brown
ARVCF	brown
BOK	brown
PRR7	brown
SLC4A3	brown
MAP3K6	brown
C20orf27	brown
RP3-395M20.12	brown
PKP3	brown
SSBP4	brown
PAFAH1B3	brown
RNASET2	brown
GADD45GIP1	brown
SAC3D1	brown
FAM69B	brown
RP11-334C17.6	brown
CAMSAP3	brown
NCEH1	brown
BAD	brown
GAA	brown
BOLA1	brown
QTRT1	brown
NUDT14	brown
RNF152	brown
RP11-11N7.5	brown
FAM195B	brown
CCDC124	brown
KIAA0196	brown
FN3K	brown
RHOT2	brown
PRKAA1	brown
RABAC1	brown
RGS14	brown
ALDH16A1	brown
OGFR	brown
SNTA1	brown
LLGL2	brown
CDK2AP2	brown
RP11-539L10.3	brown
SELO	brown
KLHL5	brown
VPS37D	brown
NAMPT	brown
DDRGK1	brown
RNU5B-2P	brown
IGSF8	brown
UNC93B1	brown
MARCKSL1	brown
PWWP2B	brown
DVL1	brown
GRTP1	brown
PAXIP1-AS1	brown
MAFF	brown
ACADVL	brown
SIX5	brown
EFR3A	brown
RABEP2	brown
CEP131	brown
RRAS	brown
GAREM	brown
MIR4740	brown
JAG2	brown
RNF19A	brown
NCOA2	brown
FLJ20021	brown
APP	brown
CHADL	brown
DOHH	brown
PAGR1	brown
WDR34	brown
APRT	brown
TMEM256	brown
NAV1	brown
NDUFS8	brown
ZNF428	brown
ARRDC1	brown
MID1IP1	brown
STAP2	brown
SNORD62B	brown
COA3	brown
HSBP1L1	brown
AC093162.5	brown
SNRPB	brown
LSR	brown
PRKAR1B	brown
GPSM1	brown
MVP	brown
PPP3CA	brown
LPP	brown
NFKBIL1	brown
NUDT1	brown
POLR2L	brown
MRPL14	brown
FBXL15	brown
FAM207A	brown
SLC25A1	brown
B3GAT3	brown
FOXO6	brown
ZNF702P	brown
ZBTB12	brown
LMNA	brown
LRP3	brown
SPAG4	brown
TRADD	brown
PNKD	brown
PHLDB3	brown
TMUB1	brown
AZIN1	brown
MFSD10	brown
UBR5	brown
MYCBP2	brown
RRNAD1	brown
KIAA1429	brown
ZNF518B	brown
OSGIN1	brown
IL17RC	brown
NT5M	brown
LSM7	brown
ZNF787	brown
ATP13A2	brown
RP11-51J9.5	brown
PRDX5	brown
NT5C	brown
HOXC-AS1	brown
ZBTB7B	brown
MIR621	brown
P3H4	brown
SPSB2	brown
GUK1	brown
TMEM125	brown
NDUFA2	brown
IER5	brown
RP11-98D18.3	brown
HCFC1R1	brown
C17orf89	brown
MRPS26	brown
GIPC1	brown
ZNF524	brown
HAGH	brown
BAIAP2	brown
NUDT16L1	brown
BCL3	brown
UCN	brown
C16orf13	brown
ZNF205	brown
COX6A1	brown
HMG20B	brown
TRAF4	brown
YOD1	brown
CDK10	brown
DUS1L	brown
RBBP8NL	brown
DGCR6L	brown
HOMER1	brown
ZNF649	brown
HLTF	brown
OSGIN2	brown
SGCB	brown
EMC9	brown
RAB40C	brown
DDT	brown
HMGCS1	brown
STUB1	brown
NENF	brown
IRF3	brown
NAB2	brown
ATAD3A	brown
FBXO44	brown
GPX4	brown
EMC6	brown
CDC42BPG	brown
MED1	brown
TP53I13	brown
C7orf50	brown
ANK3	brown
FAM46A	brown
CTB-129O4.1	brown
NUBP2	brown
RP11-505K9.1	brown
COMT	brown
AMDHD2	brown
TIMM13	brown
RP11-108M9.5	brown
HIRIP3	brown
C19orf24	brown
FAM208B	brown
WDR18	brown
HYOU1	brown
E4F1	brown
PFKFB2	brown
MGMT	brown
CDC34	brown
CARD14	brown
OXR1	brown
AC133528.2	brown
ADRM1	brown
MRPL55	brown
INF2	brown
SLC5A3	brown
RNF24	brown
CCS	brown
MRPS34	brown
NR2F6	brown
MTDH	brown
ANKRD13D	brown
PEMT	brown
INAFM1	brown
EIF3L	brown
PMVK	brown
CD151	brown
PARD6A	brown
FAM167B	brown
CCDC137	brown
CCHCR1	brown
PRR34-AS1	brown
KMT2E-AS1	brown
ATP5G1	brown
PSMG3	brown
AC004967.7	brown
MAFK	brown
GALK1	brown
STXBP2	brown
TRMT1	brown
LSM4	brown
ENKD1	brown
PPP1R13L	brown
IMPDH1	brown
URB1-AS1	brown
GABRD	brown
CLN3	brown
PCBD1	brown
KRT7	green
XIST	green
MDFI	green
MIR4664	green
ARNT2	green
IQGAP2	green
KITLG	green
SLC12A2	green
RAB11FIP1	green
LAMA3	green
S100A6	green
EFNA3	green
SEMA3C	green
MT1X	green
PRLR	green
MIR30C2	green
MIR4442	green
ABHD2	green
TRPS1	green
MBOAT1	green
NRIP1	green
EIF4EBP1	green
ITGA2	green
RP1-206D15.5	green
RP5-1180D12.1	green
CERS6	green
SEPP1	green
MIR186	green
SLC19A2	green
ITPR1	green
ZBED6	green
CYFIP2	green
MAP3K1	green
PTPN13	green
SLC38A1	green
WWP1	green
CAP2	green
MT1L	green
RP4-631H13.6	green
ERV3-1	green
KAL1	green
CRIM1	green
NUDT8	green
RP11-598P20.3	green
ST3GAL1	green
PBX1	green
VAX2	green
RNF43	green
AC144450.1	green
PLEKHF2	green
TMSB10	green
TEAD2	green
LRBA	green
ENPP4	green
NEBL	green
AHNAK	green
CTD-3157E16.1	green
ERO1LB	green
EFNA4	green
MEIS3P1	green
MCC	green
ACER2	green
RP11-204M4.2	green
VASN	green
MED13L	green
AGL	green
KCTD3	green
ARHGAP29	green
HIPK2	green
DLG5	green
DNAJA4	green
LIFR	green
FRG1B	green
DCAF10	green
PCAT6	green
ZNF737	green
RELL1	green
MGAT4A	green
MIR5581	green
ANKRD50	green
MAGI3	green
CADPS2	green
RP11-255H23.2	green
PLS1	green
CPD	green
SORL1	green
HOMER3	green
TANC2	green
PPP1R14BP3	green
MIR635	green
AC008391.1	green
RASSF8	green
AP001505.10	green
MAP9	green
PDLIM5	green
ERMP1	green
SPOPL	green
ARHGAP32	green
IDH2	green
ABCD3	green
SHROOM3	green
RP11-274B21.13	green
NPM3	green
PPP1R14B	green
THRB	green
CTD-2647L4.4	green
INADL	green
FRS2	green
RNA5SP82	green
ZNF818P	green
CHCHD10	green
MYO6	green
PER3	green
AFF4	green
DENND1B	green
EPB41L4A	green
GPR98	green
NOTCH2	green
ITGAV	green
CPT1A	green
MKL2	green
CPEB4	green
TOM1L1	green
MYO5B	green
GNG12	green
POMK	green
NBPF15	green
ST14	green
AKAP9	green
PTPLAD1	green
HHAT	green
KIAA0100	green
OSBPL8	green
GPD2	green
TXNDC16	green
UNC119B	green
PANK3	green
ARFGEF2	green
CERS2	green
KLHL11	green
SH3BP4	green
TIPARP	green
PNPO	green
RALGAPA2	green
RP1-206D15.6	green
RP4-657E11.10	green
ARFGEF1	green
AP002495.1	green
EPS8	green
ACACA	green
MFAP3	green
NXPE3	green
RP11-242D8.2	green
MSI2	green
CLMN	green
MYOF	green
EDEM3	green
AP2B1	green
CTC-429P9.2	green
RP11-111F16.2	green
GGCT	green
SNRPGP15	green
TMEM135	green
DIXDC1	green
RP11-164P12.4	green
NBEA	green
OCLN	green
RP1-283E3.4	green
ATP9A	green
DUSP16	green
MICALCL	green
NEO1	green
ZNF770	green
CTD-2245F17.3	green
MIR573	green
ZBTB41	green
KIAA0232	green
RP11-258C19.4	green
ANKRD18EP	green
KAT6A	green
MFI2-AS1	green
KIAA1109	green
FAM102B	green
SLC30A1	green
TMEM181	green
CD46	green
LMBRD2	green
SH3RF1	green
USP34	green
2008-03-01	green
AC144450.2	green
ARHGAP35	green
TBC1D14	green
MID1IP1-AS1	green
C9orf16	green
ZNF43	green
FGD6	green
ZNF281	green
ZNF91	green
DOPEY2	green
DBI	green
TMCO3	green
AKAP11	green
SAMD12	green
LIMA1	green
DENND4C	green
GLCCI1	green
MED13	green
RP11-111M22.3	green
ZNF217	green
TBC1D16	green
MLLT3	green
PFDN2	green
SPTLC2	green
PRRC2B	green
LASP1	green
NR1D2	green
AC087884.1	green
RP3-512B11.3	green
VEZF1	green
RPL22L1	green
ZNF528	green
ASH1L	green
ZNF626	green
SLC35A3	green
MAN2A1	green
AC090154.1	green
ITGB1	green
CTC-429P9.5	green
OSBPL1A	green
RNU6-531P	green
MIR590	green
FITM2	green
FYCO1	green
SUCO	green
TRIM58	green
USP37	green
TEAD1	green
RP11-458F8.1	green
MARVELD2	green
GSTCD	green
NNT	green
HOOK1	green
ZKSCAN1	green
CLTC	green
VPS13C	green
NDST1	green
MACF1	green
LARGE	green
TAOK1	green
MFSD6	green
MIR4263	green
PLA2G12A	green
MLLT4	green
PPP1R9A	green
PRRG4	green
DOCK1	green
WHSC1L1	green
FMN1	green
ZNF24	green
SCAMP1	green
RP5-1085F17.3	green
SLC25A24	green
ZNF107	green
PJA2	green
NFAT5	green
KIAA1147	green
KIAA1211	green
CYP4V2	green
FARP1	green
AC009237.11	green
TRAK2	green
NBR1	green
TMED7	green
MEIS3P2	green
USP32	green
CLDN12	green
CLCN3	green
TTC14	green
PIK3C2A	green
UHMK1	green
SYDE2	green
pk	green
PCYOX1	green
TBC1D8	green
SNORD116-24	green
NPEPPS	green
BCL9	green
TRAM1L1	green
UNC13B	green
TTC3P1	green
REL	green
AC073046.25	green
DCAF16	green
CNOT1	green
GOLPH3L	green
FAM127B	green
RP11-110I1.5	green
RAB3D	green
UBALD2	green
RP11-1094M14.11	green
EXOC2	green
ADI1	green
RP11-458F8.2	green
SETD7	green
SPIRE1	green
ACSL3	green
LYST	green
VWA8	green
FNIP1	green
CDC14A	green
AFF1	green
CD302	green
PPP2R5A	green
SMAD3	green
SOCS7	green
NIPAL3	green
SPAG1	green
SEL1L	green
ESRRA	green
RAD50	green
AC015849.19	green
NDUFS5	green
SOWAHB	green
FAR1	green
LDOC1L	green
LINC00472	green
ELF1	green
SLC38A2	green
SESTD1	green
PCMTD1	green
CTD-2008P7.9	green
RP11-554D14.2	green
KDM5B	green
LINC00152	green
GAB1	green
SHANK2	green
SYNE2	green
LNX2	green
MIB1	green
RP11-206M11.7	grey
CEACAM6	grey
PEG10	grey
KRT14	grey
S100P	grey
NPY1R	grey
CST1	grey
WFDC2	grey
PPP1R1B	grey
VTCN1	grey
SCGB2A1	grey
AREG	grey
MAOB	grey
KRT15	grey
NLRP2	grey
SYT13	grey
MGP	grey
TMEM150C	grey
ALDH3B2	grey
TMPRSS3	grey
S100A1	grey
HSPB8	grey
THRSP	grey
ZBTB18	grey
MTND4P12	grey
AQP3	grey
CXCL17	grey
MSMB	grey
AL928761.1	grey
SDR16C5	grey
MIR8071-2	grey
AARD	grey
ATP6V1B1	grey
HIST1H4H	grey
PDZK1IP1	grey
C1orf116	grey
HIST1H1C	grey
MIR205HG	grey
MT1G	grey
SLC1A1	grey
HIST1H3H	grey
SPTSSB	grey
PLEKHS1	grey
FOXI1	grey
AL122127.2	grey
SIX1	grey
HOXC10	grey
LRRN1	grey
MT1E	grey
PPP2R2C	grey
BAMBI	grey
TNS4	grey
LAMB3	grey
SPINK8	grey
SCD	grey
STC1	grey
IFIT1	grey
ERAP2	grey
IGFBP5	grey
LAMC2	grey
HIST1H2BG	grey
IRX2	grey
HOTAIR	grey
AGT	grey
MIR8071-1	grey
KCNK1	grey
ACTG2	grey
VANGL2	grey
NUPR1L	grey
ERP27	grey
HIST1H1PS1	grey
TINCR	grey
HIST1H2BC	grey
HIST3H2A	grey
CA2	grey
SERPINA1	grey
C6orf141	grey
C15orf48	grey
CKB	grey
HIST1H2AE	grey
C2orf54	grey
CNTNAP2	grey
HGD	grey
TMEM139	grey
TM4SF1	grey
GAPDHP1	grey
HIST2H2BE	grey
S100A14	grey
SEZ6L2	grey
HOXC11	grey
CA8	grey
ANXA3	grey
NELL2	grey
MIR4477B	grey
PNMAL1	grey
BARX2	grey
ANPEP	grey
CLU	grey
QPRT	grey
RAB38	grey
PITX1	grey
HIST1H3D	grey
SUSD4	grey
FASN	grey
CST6	grey
H2AFY2	grey
C2orf72	grey
PTGES	grey
CRISPLD1	grey
RP11-305M3.2	grey
CLPSL1	grey
SCNN1B	grey
SIX2	grey
CTNND2	grey
B4GALNT3	grey
NFKBIZ	grey
COL9A2	grey
ENO2	grey
BEX2	grey
EDARADD	grey
MAPK8IP2	grey
IRX1	grey
TUSC8	grey
HDGFP1	grey
EYA2	grey
EDN2	grey
GPC4	grey
OLFM1	grey
LINC01291	grey
WNT7B	grey
SYCP2	grey
GGT6	grey
HOXC13	grey
TNFSF10	grey
HIST1H2AD	grey
DHRS2	grey
FAM46B	grey
FOXD3-AS1	grey
LINGO1	grey
SOX9	grey
INHBB	grey
AL390877.1	grey
HSPB1P1	grey
GGT1	grey
NQO1	grey
HIST1H2BK	grey
RP11-800A3.4	grey
LYPD3	grey
RHOV	grey
RN7SL2	grey
ATP2A3	grey
KRT80	grey
ALDOC	grey
HIST1H2BH	grey
RASSF10	grey
MT-TT	grey
C1orf115	grey
MUC5B	grey
SYT12	grey
CDH1	grey
GSTM1	grey
LRRN2	grey
ATP1B1	grey
PSCA	grey
FAM189A2	grey
HIST1H2AI	grey
ANO1	grey
EDN1	grey
PODXL2	grey
ZNF486	grey
ZNF667-AS1	grey
RP11-34P13.16	grey
ADORA1	grey
EGLN3	grey
SUSD2	grey
CEACAM1	grey
NRIP3	grey
SMARCA1	grey
SBSPON	grey
IL17RE	grey
RP11-764K9.2	grey
PMAIP1	grey
PRKAR2B	grey
RAB36	grey
RP3-331H24.7	grey
FAM198A	grey
PCDHB2	grey
PYGL	grey
CENPV	grey
RND3	grey
EMB	grey
SLC24A3	grey
CTF1	grey
ALOX15B	grey
FHL2	grey
SESN3	grey
RN7SK	grey
RPSAP58	grey
STK19B	grey
STEAP1	grey
GRAMD2	grey
LDLRAD3	grey
OSR2	grey
SORBS2	grey
ITGB4	grey
TPD52L1	grey
PFKFB3	grey
KRT8P3	grey
SAMD11	grey
NPTXR	grey
FGFR2	grey
POF1B	grey
RP1-34B20.4	grey
HIST1H4I	grey
TSPAN5	grey
MT1A	grey
NFIX	grey
PLK2	grey
FGFR4	grey
GSPT2	grey
GBP3	grey
TMPRSS2	grey
ACSL1	grey
FKBP5	grey
ST6GALNAC5	grey
SEMA3E	grey
RASGRP1	grey
KCNF1	grey
CD44	grey
AL132988.1	grey
PRKAA2	grey
FCGBP	grey
SLC5A1	grey
ZNF204P	grey
PRSS16	grey
IL17RB	grey
MT-TL1	grey
HOXB7	grey
TM4SF18	grey
HIST1H3E	grey
UBE2Q2P6	grey
CGREF1	grey
TFPI2	grey
SH2D4A	grey
MGST1	grey
NDRG2	grey
RCN1P2	grey
TUSC3	grey
SERHL2	grey
S100A16	grey
UCP2	grey
C4orf19	grey
ABCA12	grey
SCGB3A1	grey
RP3-416H24.1	grey
SCARA3	grey
EFS	grey
DLX3	grey
TRPM2-AS	grey
MT-TY	grey
PTPRU	grey
TC2N	grey
ISOC1	grey
RP13-401N8.1	grey
NTN1	grey
CHPT1	grey
DMTN	grey
MT-TC	grey
PDLIM1	grey
FBXO32	grey
CYP2J2	grey
SGPP2	grey
GDAP1	grey
LIPH	grey
CIART	grey
KCNC3	grey
PARM1	grey
PAQR4	grey
SCNN1G	grey
SGK3	grey
CHST1	grey
VSIG2	grey
DSP	grey
TSKU	grey
GUCY1A3	grey
LGALS3BP	grey
IL1RN	grey
H3F3AP4	grey
CTC-526N19.1	grey
ERBB2	grey
DIO1	grey
VSTM2L	grey
AC044907.1	grey
IGSF9	grey
CNTFR	grey
ASRGL1	grey
SLC16A4	grey
P2RY2	grey
ARHGAP40	grey
GOLT1A	grey
RP11-108M9.4	grey
FUT2	grey
SCD5	grey
PYDC1	grey
CTSD	grey
IFITM10	grey
KDELR3	grey
ARHGEF6	grey
ABCC5	grey
MACC1	grey
GINS2	grey
MT-ND6	grey
NGFRAP1	grey
GCNT1	grey
TRIL	grey
FZD8	grey
PPM1H	grey
RASL11A	grey
ENTPD2	grey
TMEM97	grey
CGN	grey
KCNS3	grey
GLB1L2	grey
SLC6A9	grey
RNF39	grey
CA11	grey
[truncated: 3,002 more rows]
